1 **Bacterium-triggered remodeling of chromatin identifies BasR, a novel regulator of fungal**  
2 **natural product biosynthesis**

3

4 Juliane Fischer<sup>a,b#</sup>, Sebastian Y. Müller<sup>c,\*#</sup>, Agnieszka Gacek-Matthews<sup>d,e</sup>, Tina Netzker<sup>a</sup>, Nils  
5 Jäger<sup>f</sup>, Kirstin Scherlach<sup>g</sup>, Maria C. Stroe<sup>a,b</sup>, María García-Altare<sup>g</sup>, Francesco Pezzini<sup>c,j</sup>, Hanno  
6 Schoeler<sup>a,b</sup>, Michael Reichelt<sup>h</sup>, Jonathan Gershenzon<sup>h</sup>, Mario K. C. Krespach<sup>a,b</sup>, Ekaterina  
7 Shelest<sup>c</sup>, Volker Schroeckh<sup>a</sup>, Vito Valiante<sup>i</sup>, Thorsten Heinzl<sup>f</sup>, Christian Hertweck<sup>g,j</sup>, Joseph  
8 Strauss<sup>d,+</sup> and Axel A. Brakhage<sup>a, b, +</sup>

9

10 <sup>a</sup>Department of Molecular and Applied Microbiology, Leibniz Institute for Natural Product  
11 Research and Infection Biology (HKI), Beutenbergstrasse 11a, 07745 Jena, Germany

12 <sup>b</sup>Institute for Microbiology, Friedrich Schiller University Jena, Jena, Germany

13 <sup>c</sup>Systems Biology and Bioinformatics, HKI, Jena, Germany

14 <sup>d</sup>Department for Applied Genetics and Cell Biology, BOKU-University of Natural Resources  
15 and Life Sciences, Campus Tulln , Konrad Lorenz Straße 24, A-3430 Tulln/Donau, Austria

16 <sup>e</sup>Institute of Microbiology, University of Veterinary Medicine Vienna, Veterinärplatz 1, A-  
17 1210 Vienna, Austria

18 <sup>f</sup>Department of Biochemistry, Friedrich Schiller University Jena, Jena, Germany

19 <sup>g</sup>Department of Biomolecular Chemistry, HKI, Jena

20 <sup>h</sup>Department of Biochemistry, MPI for Chemical Ecology, Hans-Knöll-Str. 8, 07745 Jena,  
21 Germany

22 <sup>i</sup>Leibniz Research Group – Biobricks of Microbial Natural Product Syntheses, HKI, Jena,  
23 Germany

24 <sup>j</sup>Friedrich Schiller University Jena, Jena, Germany

25 #equal contribution

26 **Footnotes:**

27 \*current address: Department of Plant Sciences, University of Cambridge, Downing Street,

28 Cambridge CB2 3EA, UK

29

30 +corresponding authors

31 Axel A. Brakhage

Joseph Strauss

32 Phone: +49 (0)3641-532 1001

Phone: +43 (0)147654-94120

33 Fax: +49 (0)3641-532 0802

Fax: +43 (0)136006-6392

34 Email: [axel.brakhage@leibniz-hki.de](mailto:axel.brakhage@leibniz-hki.de)

Email: [joseph.strauss@boku.ac.at](mailto:joseph.strauss@boku.ac.at)

35

36 **Key words:** *Aspergillus nidulans*, histone modification, secondary metabolism, orsellinic acid,  
37 ChIP-seq, cross-pathway control, *Streptomyces rapamycinicus*, myb-like BasR, microbial  
38 interaction

39

40

41

42

43

44

45

46 **Abstract**

47 Fungi produce numerous secondary metabolites (SMs), which possess various functions *e.g.*  
48 as communication signals during coexistence with other microorganisms. Many SM  
49 biosynthesis gene clusters are silent under standard laboratory conditions because their  
50 environmental or developmental triggers are unknown. Previously, we discovered that the  
51 silent orsellinic acid (*ors*) gene cluster in the filamentous fungus *Aspergillus nidulans* is  
52 activated upon interaction with the bacterium *Streptomyces rapamycinicus* and that this  
53 induction is dependent on the GcnE lysine-acetyltransferase catalyzing histone H3  
54 acetylation. Here, we report a genome-wide analysis of chromatin acetylation changes  
55 during this interaction and relate these to changes in the fungal transcriptome. Our results  
56 reveal that only a functional interaction with *S. rapamycinicus* changes the chromatin  
57 landscape and activates amino acid cross-pathway control in the fungus. We identified the  
58 Myb-like transcription factor BasR as novel regulator required for bacteria-triggered SM  
59 production and show that its function is conserved in other *Aspergillus* species.

60

61

62

63

64

65

66

67

68

69

## 70 Introduction

71 Recent advances in sequencing and mining of genomes have revealed the great potential of  
72 fungi to produce a plethora of novel secondary metabolites (SMs) (Wiemann and Keller,  
73 2014, Macheleidt et al., 2016). These metabolites, also referred to as natural products, are  
74 low-molecular mass molecules of diverse chemical structures often with pharmacological  
75 relevance like antibiotics or cholesterol-lowering agents (Brakhage, 2013). However, the  
76 actual number of identified natural products is low when compared to the computationally  
77 identified SM gene clusters (SMCs) (Netzker et al., 2015). Many SMs are supposed to  
78 function as info-chemicals for the communication between species (Brakhage, 2013), as  
79 antimicrobials for the defense against competitors in the habitat (Keller, 2015) or as  
80 pathogenicity factors directed against host defense (Stack et al., 2007, Kazan et al., 2012). In  
81 the last decade an increasing number of studies have concentrated on fungal co-cultivation  
82 to allow for the identification of new metabolites (Scherlach and Hertweck, 2009). As an  
83 example, pestalone, an antibiotic active against methicillin-resistant *Staphylococcus aureus*  
84 and vancomycin-resistant *Enterococcus faecium*, was initially identified in a mixed  
85 fermentation of *Pestalotia* sp. and an unidentified bacterium of the genus *Thalassopia* sp.  
86 (CNJ-328) (Cueto et al., 2001). Previously, we showed that during co-cultivation of the  
87 fungus *Aspergillus nidulans* with a single bacterium identified from more than 50 species,  
88 *i.e.*, *Streptomyces rapamycinicus*, the cryptic orsellinic acid (*ors*) gene cluster was activated  
89 (Schroeckh et al., 2009). Further results indicated that the bacterium caused increased  
90 acetylation of histone H3 lysine (K) 9 and 14 at the *ors* cluster genes leading to their  
91 activation (Nützmann et al., 2011). In line, the exchange of lysine 14 to arginine, mimicking a  
92 hypoacetylated lysine residue, drastically reduced the production of orsellinic acid  
93 (Nützmann et al., 2013). The deletion of the gene coding for the lysine-acetyltransferase

94 (KAT also HAT) *gcnE* confirmed that the activation of the *ors* gene cluster is mediated by  
95 acetylation (Nützmann et al., 2011).

96 GcnE is part of the SAGA complex, which is highly conserved throughout eukaryotes.  
97 Depending on the species, SAGA consists of about 20 subunits with different functions  
98 (Baker and Grant, 2007). GcnE is responsible for the transfer of an acetyl group from acetyl-  
99 CoA to proteins like histones (Downey et al., 2015). Interestingly, GcnE of *A nidulans* is also  
100 essential for the production of the mycotoxin sterigmatocystin and the antibiotic penicillin as  
101 well as for conidiophore formation, indicating a role as global regulator of both secondary  
102 metabolism and development (Nützmann et al., 2011, Nützmann et al., 2013, Cánovas et al.,  
103 2014). The homologue for GcnE in *Saccharomyces cerevisiae* is Gcn5, which was first  
104 identified as major regulator of the cross-pathway control system. Due to its identification in  
105 a mutant (aas) sensitive against an amino acid analogue, it was originally named AAS104  
106 (Penn et al., 1983). The fungal cross-pathway control system mediates the cross regulation  
107 of amino acid biosyntheses upon starvation for distinct amino acids (Krappmann and Braus,  
108 2005).

109 The specific cross-domain microbial interaction between a eukaryotic microorganism  
110 (fungus) and a bacterium analyzed here, provides an excellent model to elucidate the  
111 underlying molecular mechanisms during microbial communication. In order to obtain a  
112 holistic view on the fungal bacterial interaction, and discover the molecular elements  
113 involved, we employed a genome-wide chromatin immunoprecipitation (ChIP) analysis  
114 during co-cultivation. This led to the discovery of major changes in the chromatin landscape  
115 triggered by the bacterium and the identification of BasR as the key regulatory node for  
116 integrating bacterial signals leading to regulation of SM gene clusters  
117

118 **Results**

119

120 **Genome-wide profiles of H3K9 and H3K14 acetylation in *A. nidulans* change upon co-**  
121 **cultivation with *S. rapamycinicus***

122 *A. nidulans* with and without *S. rapamycinicus* was analyzed for enrichment of acetylated  
123 (ac) histone H3 at lysines K9 and K14. For each condition, we performed ChIP-seq analyses  
124 on three independent biological replicates (Fig. 1; supplementary results) and investigated  
125 the genome-wide H3K9 and H3K14 chromatin landscape of *A. nidulans* (for details see  
126 supplementary results). The first examination of data indicated a significant proportion of  
127 co-incubated library reads (~ 80 %) originated from *S. rapamycinicus*. To account for those  
128 reads a fused genome containing the *A. nidulans* and the *S. rapamycinicus* genomes serving  
129 as our reference for mapping were constructed (see methods & supplemental results). By  
130 applying a fused genome we could quantify the relative library proportions which amounted  
131 to 8-17 % of H3, H3K14ac and H3K9ac as well as a staggering ~80 % for background reads of  
132 co-incubated libraries mapped to *S. rapamycinicus* (Table S1). However, the background  
133 read proportions might not necessarily reflect actual gDNA ratios of both species in the co-  
134 cultivation due to various potential biases. To examine read distribution for each library, we  
135 counted mapped reads within equally spaced bins along the fused genome for different  
136 resolutions (see methods and Fig. 1 A & B). As expected, background reads (Fig. 1 A, panel 1)  
137 were evenly distributed across the genome reflecting nonspecific targeting of particular  
138 areas. The fused genome further enabled for easily controlling of correct co-incubation since  
139 no reads should be mapping to *S. rapamycinicus* in non-co-incubated samples as can be seen  
140 in Fig. 1 in panels 2-4 (blue lines). Further, there were coverage dips in the middle of the

141 chromosomes (see Fig. 1 A, panels 1-5), which were most likely due to incomplete assembly  
142 around the centromers masked by long 'N' stretches (Ekblom and Wolf, 2014).  
143 H3K14ac and H3K9ac showed a higher degree of variability across the genome compared to  
144 H3 implying a more specific regulatory dynamics by histone acetylation than through H3  
145 localization. Some areas such as a region on the first half on chromosome 4 are particularly  
146 enriched in those marks, potentially marking distinctive chromatin domains. Since gene  
147 density also varies across the genome (Fig. 1 A panel 5), we addressed the question whether  
148 this correlates with the intensity of the investigated chromatin states. Calculated spearman  
149 correlation (for details see supplementary results) showed almost no correlation between  
150 the background and the genes. A domain particularly enriched for H3K9ac was found around  
151 the *ors* gene cluster (Fig. 2), thus supporting our previous data by Nützmänn et al. (2011).  
152 The slight increase in H3K14ac at these promoters is apparently not seen because we only  
153 considered about 2 nucleosomes (Fig. 2) in contrast to the whole promoter areas in Fig. 1.  
154 However, the distribution of H3K14ac clearly changed during co-cultivation as seen in the  
155 IGB genome browser screen shot (Fig. 1 C) which visualizes the specific location of  
156 acetylations and histone H3 in this cluster. Again, increase of H3K9ac intensity was more  
157 pronounced than H3K14ac, although also clearly detectable, compared to modifications at  
158 genes, which are not induced by the streptomycete with particularly strong enrichment of  
159 both modifications at the *orsD* promoter. Unmodified H3 is strongly depleted throughout  
160 the cluster, especially at the *orsA* and *orsD* translation start sites (TSS).

161

## 162 **Chromatin profiles at translation start sites and translation termination sites**

163 Having analyzed the genome-wide distribution we next set out to assess the location of  
164 H3K9ac, H3K14ac and histone H3 relative to promoters and gene bodies by plotting the

165 average read count frequency for all genes to either the TSS or the translation termination  
166 site (TTS) (Fig. 3 A and B) (Yu et al., 2015). Note, due to missing information about the 5' and  
167 3' transcriptional start and stop sites we used translation for transcription start and stop  
168 sites as surrogates. The results obtained apply to both *A. nidulans* with and without  
169 bacterium. H3K9ac and H3K14ac showed highest enrichment for the first and second  
170 nucleosomes up- and downstream of the TSS and drastic reduction downstream of the third  
171 nucleosome after the TSS (Fig. 3 A and B). Reduced occupancy of unmodified histone H3 was  
172 observed at the TSS (Kaplan et al., 2010). Towards the 3' end of genes, histone H3 occupancy  
173 gradually increased, which was accompanied by a decrease in acetylation. Plotting of  
174 differentially acetylated H3K9ac against H3K14ac showed a strong correlation between the  
175 localization of the two modifications (Fig. 4 A). Acetylation is generally described as an  
176 transcription activating mark (Gacek and Strauss, 2012). To test for this general assumption  
177 we correlated our acetylation data to microarray data generated under the same condition  
178 by Nützmänn et al. (2011) (Fig. 4 B). Thereby, log-fold changes (LFCs) of the differential  
179 chromatin states were compared with the LFCs retrieved from the RNA expression data.  
180 H3K9ac correlates to the differentially expressed genes with a confidence of 0.2 in contrast  
181 to H3K14ac (-0.05) and histone H3 (-0.01) for which no detectable dependency was  
182 determined (Fig. S1, S2). To visualize the deviation of acetylation at the TSS and the TTS  
183 according to the grade of expression of the genes, we separated the differentially expressed  
184 genes into four quartiles (q1 lower 25 %, q2 the medium lower 25 – 50 %, q3 are the  
185 medium higher 50-75 %, q4 higher 25 %). The increase of acetylation at the TSS correlated  
186 with the expression level of genes (Fig. S3, S4 A & C). Decreased expression coincided with  
187 an increase of histone H3 at the TSS (Fig. S4 E).

188



189 **Co-cultivation of *A. nidulans* with *S. rapamycinicus* had a major impact on SM gene**  
190 **clusters, nitrogen assimilation and mitochondrial activity**

191 We employed two strategies to determine changes of histone modification levels. The first  
192 analysis was based on the finding that histone acetylation can mostly be found on histones  
193 within a gene, in particular on nucleosomes +1 and +2 (Jiang and Pugh, 2009) (Fig. 3 A). We  
194 therefore counted mapped reads in between gene boundaries for each library as basis for a  
195 quantitative comparison between mono- and co-cultivation using standard methods for  
196 sequencing data (see methods). Throughout this study, we refer to this method as  
197 differential chromatin state (DCS) analysis. The second analysis was based on a first round of  
198 peak-calling and subsequent quantification of the peaks. Comparison of the generated data  
199 sets showed  $84 \pm 1.7$  % similarity. The data obtained from the gene-based DCS method were  
200 used for further analysis and comparison of the culture conditions using an FDR cut-off of  
201 0.01. This does not include further filtering on the LFC to capture possible biological  
202 relevance of the detection changes. DCS analysis of H3, as a proxy for nucleosome  
203 occupancy, was found to be lower (FDR < 0.01) in four genes during co-cultivation. Using the  
204 same cut-off, H3K14ac levels were found to be lower for 154 genes and higher for 104 genes  
205 (Table 1). Most genes showed differential acetylation for H3K9ac with 297 being significantly  
206 lower and 593 being significantly higher. Gene expression according to the microarray data  
207 showed correlation with H3K9 acetylation. Therefore, a list of genes obtained from H3K9ac  
208 DCS analysis was collated showing a high correlation with gene expression. Data for a  
209 selection of genes is summarized in Table 1 showing LFCs of H3K9ac ChIP-seq with their  
210 corresponding microarray data. In total, histones belonging to six SM gene clusters showed  
211 higher acetylation including the *ors*, aspercryptin, cichorin, sterigmatocystin (*stc*), anthrones  
212 (*mdp*) and 2,4-dihydroxy-3-methyl-6-(2-oxopropyl)benzaldehyde (DHMBA) gene cluster with

213 the emericellamide (*eas*) cluster being the only one with reduced acetylation and  
214 expression (Table 1). Genes covered by much higher acetylated histone H3 displayed  
215 functions in calcium signaling and asexual development with a few exceptions. A major  
216 group of genes with lower acetylation is linked to the fungal nitrogen metabolism including  
217 genes for the utilization of primary and secondary nitrogen sources such as genes of the  
218 nitrate-assimilation gene cluster and the glutamine dehydrogenase gene (Fig. 5 & Fig. 6 A).  
219 These data were verified by quantifying the expression of affected genes by qRT-PCR (Fig. 6  
220 B). The majority of the selected genes were lower transcribed in mixed cultivation compared  
221 to monoculture of *A. nidulans*. Furthermore, genes annotated with mitochondrial function  
222 showed decreased acetylation of H3K9. Constrained mitochondrial activity should alter the  
223 metabolic state of a cell. Therefore, we measured the latter in the fungus with an assay  
224 based on the reduction of resazurin to the highly fluorescent dye resorufin, which indicates  
225 the respiratory activity of a cell. The fungus alone showed a high metabolic activity, which  
226 was significantly reduced in co-cultivation (Fig. 6 C). Axenic cultivation of *S. rapamycinicus*  
227 and treatment of *A. nidulans* behaved similar to the AMM control (Fig. 6 C).

228

### 229 **Bacteria induce the fungal cross-pathway control**

230 A number of genes related to amino acid metabolism including the cross-pathway  
231 controlling gene *cpcA* showed increased acetylation for H3K9 during co-cultivation of *A.*  
232 *nidulans* with *S. rapamycinicus*. Therefore, the expression level of *cpcA* and *jlbA* (jun-like-  
233 bZIP), both highly expressed during amino acid starvation, was studied. qRT-PCR analysis  
234 showed up-regulation of *cpcA* and *jlbA* upon co-cultivation of the fungus with the bacterium  
235 (Fig. 7 A). These data implied that the increased expression of *cpcA* and other genes involved  
236 in amino acid biosynthesis was due to a depletion of amino acids in the cell. Therefore, we

237 measured the internal amino acid pool in *A. nidulans* both grown alone and with *S.*  
238 *rapamycinicus* (Fig. 7 C). As a control, the fungus was co-cultivated with *Streptomyces*  
239 *lividans*, which does not induce the *ors* gene cluster. As shown in Fig. 7C, significantly  
240 reduced levels of glutamine, histidine, phenylalanine, asparagine, threonine and reduced  
241 metabolism of arginine, which was supplemented to the medium, were observed. The  
242 monoculture of *A. nidulans*, a co-cultivation of *A. nidulans* with *S. lividans* as well as the  
243 addition of *S. rapamycinicus* after 24 h of fungal cultivation served as controls. All of the  
244 controls showed similar amino acid levels. Subsequently, we tested whether orsellinic acid  
245 production can be artificially induced *via* the addition of the histidine analogon 3-  
246 aminotriazole (3-AT), which is known to induce the cross-pathway control by amino acid  
247 starvation. As shown in Fig. 7 B, addition of 3-AT to *A. nidulans* monoculture led to  
248 production of orsellinic and lecanoric acid.

249

## 250 **The transcription factor BasR is the central regulatory node of bacteria-triggered SM gene** 251 **cluster regulation**

252 The lack of a transcription factor-encoding gene in the *ors* gene cluster and the deregulation  
253 of amino acid biosynthesis during the interaction indicated that transcription factors of the  
254 cross-pathway control system, such as *cpcA*, might be involved in regulation of the *ors* gene  
255 cluster. However, deletion of the *cpcA* gene in *A. nidulans* showed no effect on the induction  
256 of the *ors* gene cluster in response to *S. rapamycinicus* (Fig. S5). Further transcription factors  
257 found in *S. cerevisiae* to be involved in amino acid regulation are Bas1 and Bas2 (Springer et  
258 al., 1996, Valerius et al., 2003). Two genes were identified in the *A. nidulans* genome  
259 (AN7174 & AN8377) encoding putative orthologues of the *S. cerevisiae bas1* (Fig. S6). Both  
260 genes code for Myb-like transcription factors whose function in filamentous fungi is

261 unknown. For *bas2* there seems to be no existing orthologue in *A. nidulans*. We compared  
262 the H3K9 acetylation and gene expression of both genes upon co-cultivation. As the gene  
263 *AN7174* showed higher H3K9 acetylation (LFC = 0.6) and drastically increased transcription  
264 (LFC = 57.8) in response to the bacterium, we decided to use it for further analyses and  
265 named it *basR*. A *basR* deletion strain was generated by replacing the ORF of *basR* with the  
266 *argB* cassette (Fig. S7 A). Expression of selected *ors* genes in the deletion strain compared to  
267 the wild-type strain was analyzed by qRT-PCR analysis (Fig. 8 A). In the *basR* deletion  
268 mutant, the *ors* genes were not activated by the bacterium, which was also illustrated by the  
269 lack of production of both orsellinic and lecanoric acid (Fig. 8 B). While the addition of 3-AT  
270 to monocultures of *A. nidulans* led to the production of orsellinic acid and derivatives  
271 thereof, the *basR* deletion mutant strain did not produce orsellinic acid upon addition of 3-  
272 AT (Fig. 7 B). Inspection of the *basR* mutant on agar plates did not reveal further obvious  
273 phenotypes (data not shown). To further substantiate the influence of *basR* on the *ors* gene  
274 cluster we generated a *basR* overexpression strain (Fig. S7 B) using the inducible *tet<sup>On</sup>* system  
275 (Helmschrott et al., 2013). Addition of doxycycline to the media induced *basR* expression as  
276 well as the expression of the *ors* gene cluster. Consistently, orsellinic and lecanoric acid were  
277 detected by HPLC analysis (Fig. 8 B). To address the question whether other SM biosyntheses  
278 are regulated by BasR we searched for other metabolites. Obvious candidates were the  
279 emericellamides, as the acetylation of the corresponding gene cluster was decreased during  
280 co-cultivation (Table 1). This finding was perfectly mirrored when we applied MALDI-mass  
281 spectrometry (MS) Imaging which showed reduced levels of emericellamides in *basR*  
282 overproducing colonies of *A. nidulans* and in co-grown colonies compared to colonies  
283 without the streptomycete (Fig. 8 C).

284

## 285 **BasR is functionally conserved in other fungal species**

286 To address the question whether *basR* homologues exist in other fungi and whether  
287 potential homologues have similar functions, we analyzed fungal genomes using BlastP.  
288 Surprisingly, obvious *basR* homologues are only present in two other fungi, *i.e.*, *Aspergillus*  
289 *sydowii* and *Aspergillus versicolor*, but are apparently lacking in others (Fig. S6). Interestingly,  
290 in both fungi a gene cluster identical to the *ors* gene cluster of *A. nidulans* was also identified  
291 (Fig. 9 A). To analyze the function of the *A. sydowii basR* gene we overexpressed the gene in  
292 *A. sydowii* using the *tet<sup>On</sup>* system (Fig. S8) and analyzed by LC-MS the appearance of novel  
293 masses. As shown in Figure 9 B, overexpression of *basR* led to the production of orsellinic  
294 acid derivatives. Co-cultivation of *A. sydowii* with *S. rapamcinicus* demonstrated that the  
295 fungal *ors* gene cluster is in fact also activated by the bacterium, again linking BasR with  
296 bacteria-triggered induction of orsellinic acid production.

297

## 298 **Discussion**

299

### 300 **Chromatin landscape of *A. nidulans* defined by H3K9 and K14 acetylation**

301 In addition to transcriptome and proteome analyses, this first analysis of the chromatin  
302 landscape of a eukaryotic microorganism influenced by a bacterium adds important  
303 information on the specific interaction between (micro)organisms. Here, we report the  
304 chromatin landscape in the fungus *A. nidulans* upon co-cultivation with *S. rapamycinicus* by  
305 genome-wide ChIP-seq analysis of acetylated histone H3 (H3K9ac, H3K14ac) and the  
306 quantification of H3. In an attempt to characterize the general distribution of nucleosomes  
307 and acetylation marks over the genome we compared the intensity of chromatin states with  
308 gene density. A lower gene density was typically found in heterochromatic regions such as

309 the centromeres and telomeres creating a repressing environment (Allshire and Ekwall,  
310 2015). We found reduced H3 occupancy in heterochromatic regions indicating either  
311 replacement of H3 by the centromere-specific H3, CENP-A or reduced nucleosome  
312 occupancy (Smith et al., 2011, Allshire and Ekwall, 2015).

313 We observed distinct peaks for H3K9ac in *A. nidulans* grown in co-culture with *S.*  
314 *rapamycinicus*. One of the areas with the highest increase in H3K9ac was the *ors* gene  
315 cluster. Hence, this data nicely confirm our previous findings of increased acetylation of  
316 H3K9 and H3K14 of the *ors* genes during the interaction of *A. nidulans* with the bacterium *S.*  
317 *rapamycinicus* (Fig. 10). Previous ChIP qRT-PCR experiments indicated a distinct increase of  
318 H3K9ac inside the cluster borders, which did not expand to neighboring genes (Nützmänn et  
319 al., 2011). By contrast, the H3K14ac modification seemed to be of a more global nature and  
320 not exclusively confined to specific regions such as the *ors* gene cluster. These conclusions  
321 were confirmed here by the pattern detected in the genome-wide ChIP data, showing no  
322 spreading of H3K9ac to genes adjacent to the *ors* gene cluster which also demonstrates the  
323 quality of the genome-wide ChIP data generated here. Furthermore, these results are also  
324 consistent with our previous finding, showing reduced expression of SM cluster genes as a  
325 consequence of lacking H3K14 acetylation (Nützmänn et al., 2013). In contrast to H3K14ac,  
326 H3K9ac is less uniformly distributed over the genome but only shows strong enrichment at  
327 promoters of certain genes. Especially high levels of acetylation can be found at *orsA* and the  
328 bidirectional promoter of *orsD* and *orsE*. This observation was recently confirmed by the  
329 finding that H3ac and H3K4me3 were increased at the *orsD* gene only when the *ors* cluster  
330 was transcriptionally active (Gacek-Matthews et al., 2016).

331 The number of genes within an SM cluster decorated with activating chromatin marks seems  
332 to vary considerably between species and histone modifications. For example, ChIP-seq

333 analysis of H3K9ac in *Fusarium fujikuroi* did not show any difference in the degree of  
334 acetylation of the gibberellin and the bikaverin cluster genes (Studt et al., 2013). In the  
335 gibberellin cluster only a subset of genes showed methylation of the H3K4 residue  
336 (Wiemann et al., 2013). H3K9ac on the other hand was evenly distributed over promoter  
337 areas of PKS19, gibberellin, bikaverin and apicidin-like cluster genes (Wiemann et al., 2013).  
338 We also assessed the distribution of H3K9ac and H3K14ac as well as the C-terminus of H3  
339 (H3Cterm) at the TSS and TTS. For H3K9, an enrichment of acetylation ~500 bp downstream  
340 of the TSS as well as immediately upstream of the TSS was observed. This was expected as  
341 similar results were obtained with an antibody targeting the acetylated N-terminus of  
342 histone H3 in *A. nidulans* (Gacek-Matthews et al., 2016) and other fungi such as *S. cerevisiae*  
343 and *Cryptococcus neoformans* (Haynes et al., 2011, Mews et al., 2014). Increased acetylation  
344 coincides with reduced levels of H3 around the TSS, which is most likely due to a depletion of  
345 nucleosomes at the promoter. The profile plots for H3K14 acetylation are similar, although  
346 not as highly enriched around the TSS as H3K9 (Fig. S3). As expected, a comparison of LFCs  
347 for both modifications showed high similarity suggesting that they are established  
348 interdependently (Gacek and Strauss, 2012, Waters et al., 2015). At the 3' end of the ORF,  
349 H3 density drastically increased accompanied by reduced levels of H3K9ac and H3K14ac (Fig.  
350 S4). Likewise, reduced acetylation at the TTS was observed in *A. nidulans* (Gacek-Matthews  
351 et al., 2016) and *S. cerevisiae* (Mews et al., 2014). It is interesting to notice, that the increase  
352 in nucleosome density directly correlated with a decrease in the gene expression rate (Fig.  
353 S4 E). Previous studies suggested a direct correlation between the presence of nucleosomes  
354 and the stalling of RNA II polymerase (Grosso et al., 2012). Thereby, the increased  
355 integration of nucleosomes behind the poly(A) site led to pausing of the RNA polymerase  
356 resulting in the termination of transcription (Grosso et al., 2012).

357 **Increased gene expression directly correlates with histone H3K9 acetylation**

358 Acetylation is generally regarded as an activating chromatin mark promoting transcription of  
359 eukaryotic genes (Bannister and Kouzarides, 2011). The acetylation of H3K9 and expression  
360 of genes directly correlated when we compared data from this study with microarray data  
361 obtained by Nützmann et al. (2011) (Fig. S1, S2). A similar finding was reported for other  
362 fungi (Wiemann et al., 2013). However, this was not observed for acetylation of H3K14,  
363 which could partly result from the low number of targets with this modification. By contrast,  
364 analysis of gene promoters showed a distinct increase of H3K14ac at the TSS in dependence  
365 on the average transcription level (Fig. S4 C). The low correlation between active gene  
366 transcription and acetylation at H3K14 confirmed earlier results obtained by our group.  
367 Previously, we showed that a mimicry of a hypo-acetylated lysine 14 on histone H3  
368 drastically altered the phenotype and the expression of SM gene clusters in this strain  
369 (Nützmann et al., 2013). This effect, however, was overcome when later time points of  
370 cultivation were considered. Taken together, the primary location at the TSS and the major  
371 defect in SM production at earlier stages indicate a role for H3K14ac in transcriptional  
372 initiation. Furthermore, hyper-acetylation at H3K14 could be relevant for marking active  
373 genes and providing a docking site for regulatory proteins. The low correlation of gene  
374 expression and H3 acetylation might be explained by a greater spatial phasing rather than  
375 strong changes in the level of H3K14ac. However, at this stage also different specificity of the  
376 antibodies resulting in the shown acetylation profiles for both modifications cannot be  
377 excluded.

378

379

380



381 ***S. rapamycinicus* silences fungal nitrogen metabolism**

382 A substantial number of genes involved in primary and secondary nitrogen metabolism were  
383 strongly depleted for H3K9ac. This correlated with reduced expression of the respective  
384 genes measured by microarray and qRT-PCR analyses. Thus, upon contact with the  
385 bacterium *A. nidulans* silenced nitrogen uptake and degradation of various nitrogen sources,  
386 leading to nitrogen starvation. In *A. nidulans* nitrogen starvation leads to AreA-mediated  
387 histone H3 acetylation at nitrate gene promoters (Berger et al., 2008).

388 Under low nitrogen conditions like nitrogen starvation or low availability of primary nitrogen  
389 sources, such as glutamine and ammonium, the intracellular level of glutamine drops  
390 (Tudzynski, 2014). This was in fact observed for the intracellular concentration of amino  
391 acids in *A. nidulans*. These findings support the hypothesis that in presence of *S.*  
392 *rapamycinicus* but not of non-inducing streptomycetes (e.g. *S. lividans*) the fungus is in a  
393 physiological state of nitrogen starvation (Fig. 10). This finding further underlines the  
394 specificity of the interaction of *S. rapamycinicus* with *A. nidulans*. Interestingly, nitrogen  
395 availability is a trigger for the activation of a multitude of SM gene clusters including the *ors*  
396 gene cluster (Feng and Leonard, 1998, Scherlach et al., 2011, Studt et al., 2012, Niehaus et  
397 al., 2014). Nitrogen starvation also activates the expression of the anthrone (*mdp*) gene  
398 cluster (Scherlach et al., 2011), which we also observed in our data. However, induction of  
399 orsellinic acid production by nitrogen deficiency took about 60 h, whereas co-cultivation  
400 already triggered expression of the cluster after 3 h. Therefore, it is unlikely that the  
401 bacteria-triggered activation of the cluster is exclusively achieved by restricting nitrogen  
402 availability for the fungus. Furthermore, shortage of nitrogen leads to de-repression of genes  
403 involved in the usage of secondary nitrogen sources, which was not obvious from our data.  
404 In *S. cerevisiae*, it was shown that a shift from growth under nutrient sufficiency to nitrogen

405 starvation induced degradation of mitochondria (Eiyama et al., 2013). Interestingly, upon  
406 contact with the bacterium decreased acetylation and transcription of genes with  
407 mitochondrial function were also detected. This was further supported by a lower  
408 mitochondrial metabolic activity in the fungal cells during co-cultivation. Responsible for the  
409 degradation of mitochondria in yeast is a tightly controlled process called mitophagy which  
410 is independent of canonical autophagy (Kanki and Klionsky, 2008). Since *S. rapamycinicus*  
411 produces rapamycin, which is known to induce autophagy in filamentous fungi (Dementhon  
412 et al., 2003, Kim et al., 2011), we also tested a *Streptomyces iranensis* mutant deficient in  
413 rapamycin biosynthesis. Because this mutant was still able to induce the *ors* gene cluster,  
414 rapamycin does not play a role in induction (data not shown).

415

416 **BasR is a central regulatory node for integrating bacterial signals leading to regulation of**  
417 **SM gene clusters**

418 Another consequence of nitrogen starvation is the reduced availability of amino acids in the  
419 cell. Consequently, as shown here, the amino acid biosynthetic pathways represented a  
420 major group of de-regulated genes at both the acetylation level and the expression level.  
421 Amino acid biosynthesis in fungi is regulated by the cross-pathway control system (*cpc*)  
422 (Tudzynski, 2014). Since deletion of the central cross-pathway control gene *cpcA* in *A.*  
423 *nidulans* did not affect the induction of the *ors* gene cluster (Fig. S5), but on the other hand  
424 the artificial inducer of the cross-pathway control system 3-AT (Sachs, 1996) induced the  
425 production of orsellinic and lecanoric acid already after 24 h, it was reasonable to assume  
426 that cross-pathway control somehow plays a role. 3-AT is a structural analogue of histidine  
427 triggering histidine starvation in the fungal cell and thereby the cross-pathway control  
428 (Sachs, 1996). In *S. cerevisiae*, other regulators were also shown to induce the histidine

429 biosynthesis gene promoter *HIS7* upon purine starvation. This is achieved by cooperation  
430 of the *S. cerevisiae* Gcn5 with the heterodimeric transcription factor Bas1/Bas2p (Valerius et  
431 al., 2003, Daignan-Fornier and Fink, 1992). In contrast to the *S. cerevisiae* Bas1 protein (811  
432 amino acids, Zhang et al., 1997) the *A. nidulans* orthologue identified here only consists of  
433 305 amino acids with an N-terminal Myb-like domain. The C-terminal activation and  
434 regulatory (BIRD) domain of Bas1, which was described to mediate the Bas1p-Bas2p  
435 interaction (Pinson et al., 2000), is missing in the *A. nidulans* BasR. As shown here, *basR* was  
436 highly up-regulated in the microarray data which coincided with increased H3K9 acetylation  
437 of the gene promoter.

438 *basR* deletion and overexpression clearly demonstrated the function of this transcription  
439 factor in activating the *ors* gene cluster in dependence of *S. rapamycinicus*. Interestingly, the  
440 *basR* gene could not be found in all fungal genomes analyzed here, but for example in *A.*  
441 *sydowii* where also an *ors* gene cluster was found by bioinformatics analysis. As in *A.*  
442 *nidulans*, overexpression of the *A. sydowii basR* gene led to the activation of the silent *ors*  
443 gene cluster. Based on this finding we predicted that *S. rapamycinicus* also induces the *ors*  
444 gene cluster in *A. sydowii* which indeed was the case.

445 Genome-wide ChIP-seq analysis also indicated that the interaction of *S. rapamycinicus* with  
446 *A. nidulans* influenced other SM gene clusters, *e.g.*, it led to repression of the formation of  
447 emericellamides. Most interestingly, also for this repression, BasR was required, indicating  
448 that overexpression of *basR* phenocopies the regulation by *S. rapamycinicus*. Our data  
449 suggest that BasR represents a regulator required for transduction of signals perceived from  
450 the bacterium leading to the regulation of SM gene clusters (Fig. 10).

451

452

## 453 **Materials and Methods**

454 **Microorganisms, media and cultivation.** Microorganisms are listed in Table 2. *A. nidulans*  
455 strains were cultivated in *Aspergillus* minimal medium (AMM) at 37 °C and 200 rpm  
456 (Brakhage and Van den Brulle, 1995). AMM was supplemented according to the  
457 requirements of the strains as follows: arginine (871 µg/mL), *p*-aminobenzoic acid (3 µg/mL)  
458 and pyridoxine HCl (5 µg/mL). Pre-cultures were inoculated with  $4 \times 10^8$  spores per mL. 10  
459 µg/mL doxycycline was used to induce the *tet*<sup>On</sup> inducible system. For the measurement of  
460 orsellinic acid, mycelia of overnight cultures (~16 h) in AMM were transferred to fresh  
461 medium and inoculated with *S. rapamycinicus*, as described by Schroeckh et al. (2009). RNA  
462 extraction for expression analysis during co-cultivation was performed after 3 h of  
463 cultivation. For the expression analysis of the *basR* overexpression mutant samples for RNA  
464 extraction were taken after 6 h of cultivation; samples for HPLC analysis were taken after 24  
465 h. *A. sydowii* was cultivated at 28 °C and 200 rpm in malt medium (Scherlach et al., 2010).  
466 For the induction of the *ors* cluster, 48-hour old precultures grown at 28 °C in malt medium  
467 were first transferred to fresh AMM and inoculated with *S. rapamycinicus* or doxycycline.  
468 Doxycycline was added twice over the course of 48 hours, adding up to a final concentration  
469 of 20 µg/mL. The cultures were allowed to grow at 28 °C; samples were taken for LC-MS  
470 analysis after 96 hours for *A. sydowii* co-cultivation and after 48 hours for the *basR*  
471 overexpression mutant.

472 For MALDI-MS Imaging analysis conductive ITO slides (Bruker Daltonics, Bremen, Germany)  
473 were coated with 3 mL 0.5% (w/v) AMM agar and incubated at room temperature for 30  
474 minutes (Araújo et al., 2017, Aiyar et al., 2017). Equal conditions were ensured by  
475 supplementing all slides with arginine regardless of the fungal genotype. 20 µg/mL  
476 doxycycline was used to induce the *tet*<sup>On</sup> inducible system. *S. rapamycinicus* was applied by

477 filling 5 mL of a preculture in a tube for 10 minutes and point inoculation of 15  $\mu$ l of the  
478 settled *S. rapamycinicus* mycelium on the agar. *A. nidulans* and its respective mutants were  
479 applied by point inoculation of 500 spores. For co-cultivation experiments, the fungus and  
480 the streptomycete were inoculated 1 cm apart from each other. The slides were incubated  
481 at 37 °C in a petri dish for 4 days. After incubation, the fungal spores were removed with  
482 adhesive tape. The slides were dried by incubation in a hybridization oven at 37 °C for 48  
483 hours.

484 **qRT-PCR.** Expression levels were quantified by qRT-PCR. Total RNA was purified with the  
485 Universal RNA Purification Kit (roboklon, Berlin, Germany) according to the manufacturer's  
486 instructions including DNase I treatment. Reverse transcription of 5  $\mu$ g RNA was performed  
487 with RevertAid Reverse Transcriptase (Thermo Fisher Scientific, Darmstadt, Germany) for 3 h  
488 at 46 °C. cDNA was amplified on an Applied Biosystems StepOnePlus Real-Time PCR system  
489 (Foster City, USA). Quantitative RT-PCR of 3 ng/ $\mu$ l cDNA samples was performed with MyTaq  
490 HS mix 2x (Bioline, Luckenwalde, Germany) and EvaGreen (Biotium, Fremont, California,  
491 USA) using primers for the respective target genes (Table S2). The PCR parameters included  
492 an initial DNA denaturation step at 95 °C for 2 min, followed by 45 cycles with DNA  
493 denaturation at 95 °C for 5 s and primer annealing and extension at 62 °C for 15 s. The *A.*  
494 *nidulans*  $\beta$ -actin gene (*AN6542*) was used as an internal standard for calculation of  
495 expression levels as previously described (Schroeckh et al., 2009).

496 **Preparation of chromosomal DNA and Southern blot analysis.** *A. nidulans* genomic DNA  
497 was isolated as previously described (Schroeckh et al., 2009). Southern blotting was done  
498 using a digoxigenin-11-dUTP-labelled (Jena Bioscience, Jena, Germany) probe, as previously  
499 described (Schroeckh et al., 2009). Primers for amplification of probes are listed in Table S2.

500 **ChIP coupled to qRT-PCR analysis.** Cultures were essentially grown as described above  
501 and after 3 h the DNA was cross-linked to the proteins for 15 min with 1 % (v/v)  
502 formaldehyde at room temperature. To stop the reaction glycine was added to a final  
503 concentration of 125 mM for 5 min at 37 °C and the sample was subsequently frozen in  
504 liquid nitrogen. Powdered mycelium was dissolved in 1 ml of sonication buffer (50 mM  
505 HEPES-KOH pH 7.5, 140 mM NaCl, 1 mM EDTA, 1 % (v/v) Triton X-100, 0.1 % (w/v) Na-  
506 deoxycholate, 1 x Fungal protease inhibitor mix (Promega, Madison, Wisconsin, USA)) and  
507 330 µl aliquots were then subjected to sonication for 30 min with cycles of 2 min maximum  
508 intensity followed by a 1 min pause. Sheared chromatin was separated from cell wall debris  
509 and incubated with 40 µl of a protein A slurry for 30 min at 4 °C on a rotary shaker. A purified  
510 1:10 dilution of the supernatant was then incubated overnight at 4 °C with 3 µl of antibody  
511 directed against the desired target. Antibodies were precipitated with 40 µl of Dynabeads  
512 (Invitrogen, Carlsbad, California, USA) which were incubated with the sample for 40 min at 4  
513 °C on a rotary shaker. Samples were washed 3 times with low salt buffer (150 mM NaCl, 0.2  
514 % (w/v) SDS, 0.5 % (v/v) Triton X-100, 2 mM EDTA, 20 mM Tris-HCl pH 8) followed by one  
515 time washing with high salt buffer (500 mM NaCl, 0.2 % (w/v) SDS, 0.5 % (v/v) Triton X-100,  
516 2 mM EDTA, 20 mM Tris pH 8). Washed beads were dissolved in 125 µl TES buffer and  
517 reverse cross-linked by co-incubation with 2 µl of 0.5 M EDTA, 4 µl of 1 M Tris-HCl pH 6.5 and  
518 2 µl of 1 mg/mL proteinase K for 1 h at 45 °C. Subsequent DNA purification was conducted  
519 with a PCR purification kit and samples were eluted in 100 µl of 1:10 diluted elution buffer.  
520 Concentration of DNA of genes of interest was quantified using qRT-PCR essentially as  
521 described above. Antibodies used are the following: mouse monoclonal ANTI FLAG M2  
522 (Sigma-Aldrich, F3165-5MG, Taufkirchen, Germany), rabbit polyclonal anti-histone H3  
523 (Abcam 1791, Cambridge, UK), rabbit polyclonal histone H3K9ac (Active Motif, Catalog No:

524 39161, La Hulpe, Belgium) and rabbit polyclonal anti-acetyl-histone H3 (Lys14) (Merck  
525 Millipore, Darmstadt, Germany).

526 **Extraction of compounds from *A. nidulans* and HPLC analysis.** Culture broth containing  
527 fungal mycelium and bacteria was homogenized utilizing an ULTRA-TURRAX (IKA-Werke,  
528 Staufen, Germany). Homogenized cultures were extracted twice with 100 mL ethyl acetate,  
529 dried with sodium sulfate and concentrated under reduced pressure. For HPLC analysis, the  
530 dried extracts were dissolved in 1.5 mL of methanol. Analytical HPLC was performed using a  
531 Shimadzu LC-10Avp series HPLC system composed of an autosampler, high pressure pumps,  
532 column oven and PDA. HPLC conditions: C18 column (Eurospher 100-5 250 x 4.6 mm) and  
533 gradient elution (MeCN/0.1 % (v/v) TFA (H<sub>2</sub>O) 0.5/99.5 in 30 min to MeCN/0.1 % (v/v) TFA  
534 100/0, MeCN 100 % (v/v) for 10 min), flow rate 1 mL min<sup>-1</sup>; injection volume: 50 µL.  
535 Identification of metabolites was achieved by comparison with an authentic reference.  
536 Samples were quantified *via* integration of the peak area using Shimadzu Class-VP software  
537 (version 6.14 SP1).

538 **Extraction of compounds from *A. sydowii* and HPLC analysis.** Culture broth containing the  
539 fungal mycelium was homogenized using a T 25 ULTRA-TURRAX (IKA-Werke, Staufen,  
540 Germany). Homogenized cultures were extracted twice with equal volume of ethyl acetate,  
541 dehydrated with anhydrous sodium sulfate, filtered and reduced to dryness with a rotary  
542 evaporator (Laborota 4000 efficient; Heidolph Instruments, Schwabach, Germany). The  
543 crude extracts were reconstituted in 1 mL methanol and filtered through a 0.2-µm-pore-size  
544 polytetrafluoroethylene filter (Carl Roth, Karlsruhe, Germany). The samples were loaded  
545 onto an ultrahigh-performance liquid chromatography (LC)–mass spectrometry system  
546 consisting of an UltiMate 3000 binary rapid-separation liquid chromatograph with  
547 photodiode array detector (Thermo Fisher Scientific, Dreieich, Germany) and an LTQ XL

548 linear ion trap mass spectrometer (Thermo Fisher Scientific, Dreieich, Germany) equipped  
549 with an electrospray ion source. The extracts (injection volume, 10  $\mu$ l) were analyzed on a  
550 150- by 4.6-mm Accucore reversed-phase (RP)-mass spectrometry column with a particle  
551 size of 2.6  $\mu$ m (Thermo Fisher Scientific, Dreieich, Germany) at a flow rate of 1 mL/min, with  
552 the following gradient over 21 minutes: initial 0.1% (vol/vol) HCOOH-MeCN/0.1% (vol/vol)  
553 HCOOH-H<sub>2</sub>O 0/100, which was increased to 80/20 in 15 min and then to 100/0 in 2 min, held  
554 at 100/0 for 2 min, and reversed to 0/100 in 2 minutes. Identification of metabolites was  
555 achieved by comparison with an authentic reference.

556 **Measurement of amino acids.** Amino acids were extracted from 10 mg samples with 1 mL of  
557 methanol and the resulting extract was diluted in a ratio of 1:10 (v:v) in water containing the  
558 <sup>13</sup>C, <sup>15</sup>N labeled amino acid mix (Isotec, Miamisburg, Ohio, USA). Amino acids in the diluted  
559 extracts were directly analyzed by LC-MS/MS as described with the modification that an  
560 API5000 mass spectrometer (Applied Biosystems, Foster City, California, USA) was used  
561 (Docimo et al., 2012).

562 **Resazurin assay.** Metabolic activity was measured by the resazurin reduction to the  
563 fluorescent dye resorufin. 10<sup>4</sup> conidia of *A. nidulans* in 100  $\mu$ l AMM were pipetted in each  
564 well of a black 96 well plate. Incubation of the plate was performed for 16 h at 37 °C. The  
565 pre-grown fungal mycelium was further incubated in monoculture or together with 10  $\mu$ l of  
566 an *S. rapamycinicus* culture. Cultures were further supplemented with 100  $\mu$ l of AMM  
567 containing resazurin in a final concentration of 0.02 mg/mL. Fluorescence was measured  
568 (absorption wavelength 560 nm, emission wavelength 590 nm) every 30 minutes for 24 h at  
569 37 °C in a Tecan Fluorometer (Infinite M200 PRO, Männedorf, Switzerland). To assure  
570 physical contact of fungal and bacterial cells the plate was shaken for 30 seconds before  
571 measurement. The medium control consisted of 100  $\mu$ l AMM and 100  $\mu$ l resazurin solution.



572 For all conditions, measurements were carried out in triplicates for each of the two  
573 biological replicates. Significance of values was calculated using 2-way ANOVA Test with  
574 GraphPad Prism 5 (GraphPad Software Inc., La Jolla, California, USA).

575 **ChIP-seq pre-processing.** The *A. nidulans* FGSC A4 genome and annotation (version s10-  
576 m03-r28) were obtained from the data warehouse AspGD. The *S. rapamycinicus* NRRL 5491  
577 genome was obtained from NCBI (GI 521353217). *A. nidulans* and *S. rapamycinicus* genomes  
578 were concatenated to a fused genome to serve as the reference genome for subsequent  
579 mapping. Quality control was carried out and raw ChIP-seq reads were obtained by using  
580 FastQC v0.11.4. Trimming and filtering were achieved by applying Trim Galore utilizing  
581 Illumina universal adapter and phred+33 encoding. Reads were not de-duplicated since the  
582 duplication rate was < 15% for most libraries. Bowtie2 (version 2.2.4) using default  
583 parameters was employed to map reads to the fused genome. Quantification of reads was  
584 carried out using the Bioconductor 'GenomicAlignments' package forming the basis for three  
585 subsequent approaches. Firstly, a genome-wide equi-spaced binning across the genome with  
586 different resolutions (50k and 2k bp bins) counting reads overlapping each bin was applied.  
587 Library normalization on bin counts was performed by only considering reads mapping to  
588 the *A. nidulans* genome. Secondly, reads overlapping genes were counted, using the AspGD  
589 annotation. They formed the basis for the subsequent DCS analysis (see below). Thirdly,  
590 average profile plots to assess relative histone distributions around TSS and TTS were  
591 generated using the bioconductor package regioneR (Gel et al., 2016).

592 **Differential chromatin state analysis (DCS analysis).** To identify genes exhibiting differences  
593 in their chromatin state, we employed the bioconductor package edgeR (Robinson and  
594 Oshlack, 2010) originally developed for RNA-seq differential expression analysis but the  
595 assumptions equally hold for ChIP-seq data, *i.e.*, negative binomial distribution of reads.

596 Importantly, library normalization was achieved with the TMM (trimmed mean of M  
597 values, Robinson and Oshlack, 2010) method only based on *A. nidulans* gene counts for  
598 calculating the effective library sizes, not taking into account reads mapping to *S.*  
599 *rapamycinicus* which would otherwise artificially influence the effective library size.  
600 Comparisons were made between libraries for all ChIP targets separately obtained from  
601 monocultures of *A. nidulans* and co-cultures with *S. rapamycinicus*. These targets were H3,  
602 H3K9ac and H3K14ac. Results including normalized read counts (RPKM) statistics and log fold  
603 changes (LFCs) are reported in Table S1. Normalized counts and LFCs were also further used  
604 for comparisons with the corresponding microarray-based gene expression and LFCs.

605 **MACS analysis.** Candidate peaks were identified using two methods: a differential binding  
606 analysis (EdgeR) and a peak-calling approach (MACS, version 2.0.1) (Zhang et al., 2008). The  
607 peak caller performed several pairwise comparisons between samples with the same  
608 antibody and different conditions in order to retrieve the differentially bound peaks for that  
609 particular comparison. The program kept the track of different replicates, the signal was  
610 reported per million reads and produced a BED format track of the enriched regions, the  
611 other parameters were used with default values. The BED files were subsequently converted  
612 to Big Wig format for visualization through the tool Integrative Genomics Viewer  
613 (Thorvaldsdóttir et al., 2013).

614 **MALDI-MS imaging analysis and data processing.** Conductive ITO slides inoculated with *A.*  
615 *nidulans* and *S. rapamycinicus* were dried overnight at 37 °C in a hybridization oven and  
616 sprayed with a saturated solution (20 mg/mL) of universal MALDI matrix (1:1 mixture of 1:1  
617 mixture of 2,5-dihydroxybenzoic acid and  $\alpha$ -cyano-4-hydroxy-cinnamic acid; Sigma Aldrich,  
618 Taufkirchen, Germany) in acetonitrile/methanol/water (70:25:5, v:v:v), using the automatic  
619 system ImagePrep device 2.0 (Bruker Daltonics, Bremen, Germany) in 60 consecutive cycles

620 (the sample was rotated 180 ° after 30 cycles) of 52 seconds (2 s spraying, 10 s incubation  
621 time, and 40 s of active drying) as recommended in Hoffmann and Dorrestein (2015). The  
622 sample was analyzed using an UltrafleXtreme MALDI TOF/TOF (Bruker Daltonics, Bremen,  
623 Germany), which was operated in positive reflector mode using flexControl 3.0. The analysis  
624 was performed in the 100-3000 Da range, with 30 % laser intensity (laser type 4),  
625 accumulating 1000 shots by tanking 50 random shots at every raster position. Raster width  
626 was set at 200 µm. Calibration of the acquisition method was performed externally using  
627 Peptide Calibration Standard II (Bruker Daltonics, Bremen, Germany) containing Bradykinin1-  
628 7, Angiotensin II, Angiotensin I, Substance P, Bombesin, ACTH clip1-17, ACTH clip18-39,  
629 Somatostatin28. Spectra were processed with baseline subtraction in flexAnalysis 3.3  
630 (Bruker Daltonics, Bremen, Germany) and corrected internally using the peaks of HCCA  
631 ( $[M+H]^+$   $m/z$  190.0499 and  $[2M+H]^+$   $m/z$  379.0925). Processed spectra were uploaded in  
632 flexImaging 3.0 (Bruker Daltonics, Bremen, Germany) for visualization and SCiLS Lab 2015b  
633 (Bruker Daltonics, Bremen, Germany) for analysis and representation. Chemical image were  
634 obtained using Median normalization and weak denoising. The experiment was replicated  
635 three times, the 2<sup>nd</sup> and 3<sup>rd</sup> replicates were measured at 250 µm raster width.

636 **Generation of *A. nidulans* deletion strains.** The transformation cassettes for the *basR* and  
637 *cpcA* deletion strains were constructed as previously described (Szewczyk et al., 2007).  
638 Approximately ~1000-bp sequences homologous to the regions upstream and downstream  
639 of *basR* and *cpcA* were amplified and fused to the *argB* deletion cassette (Schroeckh et al.,  
640 2009). Transformation of *A. nidulans* was carried out as described before (Ballance and  
641 Turner, 1985).

642 **Generation of an inducible *A. nidulans* *basR* overexpressing mutant strain.** For controlled  
643 overexpression of the putative Myb-like transcription factor gene *basR*, the tetracycline-

644 controlled transcriptional activation system ( $tet^{On}$ ) system was used (Helmschrott et al.,  
645 2013). The corresponding gene sequences together with their ~1000-bp flanking regions  
646 were amplified from *A. nidulans* genomic DNA using the Phusion Hot Start Flex DNA  
647 Polymerase (New England Biolabs, Frankfurt, Germany) according to the manufacturer's  
648 instructions. The *A. nidulans pabaA* gene, complementing the *p*-aminobenzoic acid  
649 auxotrophy of the recipient strain, was used as a selectable marker. The  $tet^{On}$ -system was  
650 amplified from the plasmid pSK562. All DNA fragments were assembled by using NEBuilder  
651 HiFi DNA Assembly Master Mix (New England Biolabs, Frankfurt, Germany) according to the  
652 manufacturer's instructions. For this purpose, an additional *DraIII* restriction site was  
653 inserted in pJET1 vector (Thermo Fisher Scientific, Darmstadt, Germany). The assembled  
654 12.3-kb plasmid was restricted with *DraIII* to obtain a linear DNA fragment, which was used  
655 to complement the generated *A. nidulans*  $\Delta basR$  mutant strain.

656 **Generation of an inducible *A. sydowii basR* overexpressing mutant strain.** For the  
657 overexpression of the putative Myb-like transcription factor gene *basR* in *A. sydowii*, the  
658 tetracycline-controlled transcriptional activation system ( $tet^{On}$ ) system was used  
659 (Helmschrott et al., 2013). An expression vector was constructed by amplifying the *A.*  
660 *sydowii basR* gene from *A. sydowii* genomic DNA using the Phusion Flash High-Fidelity PCR  
661 Master Mix (Thermo Fisher Scientific, Dreieich, Germany) according to the manufacturer's  
662 instructions. The *A. oryzae hph* cassette was used as a selectable marker. The  $tet^{On}$ -system  
663 was amplified from the plasmid pSK562. All DNA fragments were assembled by using  
664 NEBuilder HiFi DNA Assembly Master Mix (New England Biolabs, Frankfurt, Germany)  
665 according to the manufacturer's instructions. The assembled 9.1 kb plasmid was used for  
666 transformation of *A. sydowii* wild type. 200  $\mu\text{g}/\text{mL}$  hygromycin was used as selection agent in  
667 all following media (Invivogen, Toulouse, France).

668 **Phylogenetic analysis.** The amino acid sequences for the two Myb-like transcription  
669 factors from *A. nidulans* (AN7174 (*basR*) and AN8377) and Bas1 from *S. cerevisiae* were used  
670 for a Blast search in the UniProtKB database (<http://www.uniprot.org>). For each sequence,  
671 the first 50 hits were retrieved. All hits were grouped together, and redundant and partial  
672 sequences removed. The obtained 54 hits were firstly aligned using MUSCLE (Edgar, 2004),  
673 and then the phylogenetic tree was obtained using the Maximum Likelihood method  
674 contained in the MEGA6 software facilities (Tamura et al., 2013).

#### 675 **Accession**

676 CHIP-seq data were deposited in the ArrayExpress database at EMBL-EBI  
677 ([www.ebi.ac.uk/arrayexpress](http://www.ebi.ac.uk/arrayexpress)) under accession number E-MTAB-5819. For access use:  
678 Username: Reviewer\_E-MTAB-5819; Password: XNLK26QT. Code for data processing and  
679 analysis can be obtained from [https://github.com/seb-mueller/CHIP-Seq\\_Anidulans](https://github.com/seb-mueller/CHIP-Seq_Anidulans).

#### 680 **Acknowledgements**

681 We thank Christina Täumer and Karin Burmeister for excellent technical assistance and Sven  
682 Krappmann (Friedrich-Alexander University, Erlangen-Nürnberg, Germany) for kindly  
683 providing plasmid pSK562. Financial support by the Deutsche Forschungsgemeinschaft  
684 (DFG)-funded excellence graduate school *Jena School for Microbial Communication* (JSMC),  
685 the *International Leibniz Research School for Microbial and Biomolecular Interactions* (ILRS)  
686 as part of the JSMC, the DFG-funded *Collaborative Research Center 1127 ChemBioSys*  
687 (projects B01, B02 and INF) and the ERC for a Marie Skłodowska-Curie Individual Fellowship  
688 (IF-EF; Project reference 700036) to María García-Altare are gratefully acknowledged.

689

690

691 **Tables**

692 **Table 1.** List of selected genes with differentially acetylated H3K9 residue and with log-fold  
 693 change (LFC) in microarray data.

|                              |                   |                                                                                                                                                              | <b>ChIP-seq</b>   | <b>Microarray</b> |
|------------------------------|-------------------|--------------------------------------------------------------------------------------------------------------------------------------------------------------|-------------------|-------------------|
| <b>Name</b>                  | <b>Annotation</b> | <b>Description</b>                                                                                                                                           | <b>LFC H3K9ac</b> | <b>LFC</b>        |
| <b>Nitrogen metabolism</b>   |                   |                                                                                                                                                              |                   |                   |
| <i>crnA</i>                  | AN1008            | Nitrate transporter with 12 predicted <i>trans</i> -membrane domains                                                                                         | -1.30             | -1.00             |
| <i>niaD</i>                  | AN1006            | Nitrate reductase (NADPH)                                                                                                                                    | -1.78             | -1.03             |
| <i>niiA</i>                  | AN1007            | Nitrite reductase                                                                                                                                            | -1.92             | -1.10             |
| <i>tamA</i>                  | AN2944            | Transcriptional co-activator of the major nitrogen regulatory protein AreA                                                                                   | -0.80             | -1.27             |
| <i>gltA</i>                  | AN5134            | Glutamate synthase, NAD <sup>+</sup> -dependent (GOGAT)                                                                                                      | -0.86             | -1.37             |
| <i>gdhA</i>                  | AN4376            | NADP-linked glutamate dehydrogenase                                                                                                                          | -1.14             | 1.04              |
| <i>ntpA</i>                  | AN5696            | Nitric oxide-induced nitrosothionein involved in NO detoxification                                                                                           | -1.16             | -1.15             |
| <i>meaA</i>                  | AN7463            | Major ammonium transporter                                                                                                                                   | -1.22             | -1.12             |
| <i>ureD</i>                  | AN0232            | Nickel-binding protein involved in utilization of urea as a nitrogen source                                                                                  | -1.44             | -1.94             |
| <i>prnD</i>                  | AN1731            | Proline dehydrogenase with a predicted role in proline metabolism                                                                                            | -1.36             | 1.01              |
| <i>prnB</i>                  | AN1732            | Proline transporter                                                                                                                                          | -1.39             | -1.39             |
| <b>Amino acid metabolism</b> |                   |                                                                                                                                                              |                   |                   |
| <i>ugeA</i>                  | AN4727            | UDP-glucose 4-epimerase, involved in galactose metabolism                                                                                                    | -0.82             | -1.54             |
| <i>qutB</i>                  | AN1137            | Quinate 5-dehydrogenase with a role in aromatic amino acid biosynthesis                                                                                      | -0.90             | 1.39              |
|                              | AN9506            | Protein with predicted amino acid <i>trans</i> -membrane transporter activity, role in amino acid <i>trans</i> -membrane transport and membrane localization | -0.98             | -1.60             |

|                          |        |                                                                                                                                                              |       |                |
|--------------------------|--------|--------------------------------------------------------------------------------------------------------------------------------------------------------------|-------|----------------|
|                          | AN1923 | Putative alanine transaminase with a predicted role in alanine and aspartate metabolism                                                                      | -1.02 | 1.13           |
|                          | AN5731 | Putative chorismate synthase with a predicted role in aromatic amino acid biosynthesis                                                                       | -1.04 | 1.02           |
|                          | AN6255 | Putative cytochrome c oxidase subunit with a predicted role in energy metabolism                                                                             | -1.08 | 1.28           |
|                          | AN8118 | Putative cytochrome c oxidase subunit with a predicted role in energy metabolism                                                                             | -1.08 | 1.26           |
|                          | AN1150 | Putative transaminase with a predicted role in arginine metabolism                                                                                           | -0.62 | 1.07           |
|                          | AN1733 | Putative delta-1-pyrroline-5-carboxylate dehydrogenase with a predicted role in glutamate and glutamine metabolism                                           | -0.79 | -1.35          |
|                          | AN2129 | Subunit 5 of the COP9 signalosome (CSN) responsible for cleaving the ubiquitin-like protein Nedd8 from cullin-RING E3 ubiquitin ligases                      | -0.50 | -2.23          |
|                          | AN3347 | Putative amino acid transporter                                                                                                                              | -0.64 | Not detectable |
|                          | AN8647 | High-affinity nitrite transporter                                                                                                                            | -0.59 | -3.90          |
|                          | AN0399 | High-affinity nitrate transporter                                                                                                                            | -0.59 | 1.16           |
|                          | AN0418 | Putative high-affinity urea/H <sup>+</sup> symporter                                                                                                         | -0.58 | 1.06           |
|                          | AN7379 | Orthologue(s) have role in negative regulation of transcription from RNA polymerase II promoter, regulation of nitrogen utilization and nucleus localization | 0.51  | 1.26           |
| <i>cpcA</i>              | AN3675 | Transcription factor of the Gcn4p c-Jun-like transcriptional activator family                                                                                | 1.02  | 2.88           |
| <i>jlbA</i>              | AN1812 | bZIP transcription factor                                                                                                                                    | 1.3   | 1.03           |
| <b>Calcium signaling</b> |        |                                                                                                                                                              |       |                |
|                          | AN3585 | Transcript induced in response to calcium dichloride in a CrzA-dependent manner                                                                              | 1.42  | 13.22          |
| <i>pmcB</i>              | AN4920 | Calcium-transporting                                                                                                                                         | 1.42  | 3.16           |

|                    |        |                                                                                     |       |        |
|--------------------|--------|-------------------------------------------------------------------------------------|-------|--------|
|                    |        | mitochondrial ATPase involved in calcium homeostasis                                |       |        |
|                    | AN3998 | Transcript induced in response to calcium dichloride in a CrzA-dependent manner     | 1.26  | 2.01   |
|                    | AN3420 | Transcript induced in response to calcium dichloride in a CrzA-dependent manner     | 1.05  | 2.24   |
|                    | AN4418 | Transcript induced in response to calcium dichloride in a CrzA-dependent manner     | 1.03  | -1.02  |
|                    | AN2427 | Transcript induced in response to calcium dichloride in a CrzA-dependent manner     | 1.00  | 2.11   |
|                    | AN0419 | Transcript induced in response to calcium dichloride in a CrzA-dependent manner     | 0.88  | -1.99  |
|                    | AN3751 | Transcript induced in response to calcium dichloride in a CrzA-dependent manner     | 0.86  | 11.83  |
|                    | AN5372 | Transcript induced in response to calcium dichloride in a CrzA-dependent manner     | 0.82  | -1.79  |
|                    | AN5993 | Has domain(s) with predicted calcium binding activity                               | 0.76  | 271.00 |
|                    | AN5341 | Orthologue(s) have calcium binding activity                                         | 0.74  | -1.26  |
|                    | AN2826 | Transcript induced in response to calcium dichloride in a CrzA-dependent manner     | 0.73  | 4.34   |
|                    | AN1950 | Orthologue(s) have FAD transmembrane transporter activity, calcium channel activity | 0.72  | -1.20  |
|                    | AN5302 | Transcript induced in response to calcium dichloride in a CrzA-dependent manner     | 0.64  | 2.21   |
| <i>mid1</i>        | AN8842 | Stretch-activated calcium channel                                                   | 0.63  | -1.00  |
| <i>pmrA</i>        | AN7464 | Calcium-transporting ATPase with a predicted role in energy metabolism              | -0.74 | -1.60  |
|                    | AN8774 | Transcript induced in response to calcium dichloride in a CrzA-dependent manner     | 0.55  | 2.40   |
| <b>Development</b> |        |                                                                                     |       |        |
|                    | AN4674 | Orthologue(s) have role in asexual sporulation resulting in                         | 1.14  | 1.21   |



|              |        |                                                                                                                                                                                                                                               |      |       |
|--------------|--------|-----------------------------------------------------------------------------------------------------------------------------------------------------------------------------------------------------------------------------------------------|------|-------|
|              |        | formation of a cellular spore, cellular response to drug and cell septum, cell surface localization                                                                                                                                           |      |       |
| <i>mstC</i>  | AN6669 | High-affinity glucose transporter active in germinating conidia                                                                                                                                                                               | 0.92 | 2.79  |
|              | AN0928 | Orthologue(s) have role in conidiophore development                                                                                                                                                                                           | 0.90 | 1.00  |
|              | AN5619 | Orthologue(s) have metallopeptidase activity, role in ascospore wall assembly and ascospore wall, endoplasmic reticulum membrane localization                                                                                                 | 0.88 | 1.29  |
| <i>fbx15</i> | AN2505 | F-box protein                                                                                                                                                                                                                                 | 0.88 | 2.38  |
|              | AN2856 | Orthologue(s) have 3'-5' exonuclease activity, role in ascospore formation, conversion of ds siRNA to ss siRNA involved in RNA interference, fruiting body development, pre-miRNA processing and perinuclear region of cytoplasm localization | 0.80 | 2.83  |
|              | AN3689 | Orthologue(s) have role in ascospore formation and cytosol, nucleus localization                                                                                                                                                              | 0.69 | 1.73  |
| <i>esdC</i>  | AN9121 | Protein with a glycogen binding domain involved in sexual development                                                                                                                                                                         | 0.68 | 1.69  |
|              | AN6898 | Orthologue(s) have role in asexual sporulation resulting in formation of a cellular spore, intraluminal vesicle formation and protein retention in Golgi apparatus, more                                                                      | 0.65 | -1.21 |
|              | AN1131 | Putative cytosolic Cu/Zn superoxide dismutase                                                                                                                                                                                                 | 0.63 | 1.13  |
|              | AN3813 | Orthologue(s) have copper uptake <i>trans</i> -membrane transporter activity and role in aerobic respiration, copper ion import, hyphal growth, spore germination, sporocarp development involved in sexual reproduction                      | 0.58 | -3.48 |
| MAT1         | AN2755 | Alpha-domain mating-type                                                                                                                                                                                                                      | 0.52 | 1.22  |

|                              |         |                                                                                                                                                                      |       |        |
|------------------------------|---------|----------------------------------------------------------------------------------------------------------------------------------------------------------------------|-------|--------|
|                              |         | protein                                                                                                                                                              |       |        |
| <i>fcyB</i>                  | AN10767 | Purine-cytosine transporter                                                                                                                                          | -0.58 |        |
| <i>tmpA</i>                  | AN0055  | <i>Trans</i> -membrane protein involved in regulation of conidium development                                                                                        | -0.58 | -8.61  |
| <i>fluG</i>                  | AN4819  | Cytoplasmic protein involved in regulation of conidiation and sterigmatocystin production                                                                            | -0.66 | 1.35   |
| <i>cffA</i>                  | AN5844  | Orthologue of <i>Neurospora crassa conF</i> , light-induced transcript expressed during conidiation in <i>N. crassa</i>                                              | -0.71 | 2.66   |
| <i>gsk3</i>                  | AN6508  | Protein kinase                                                                                                                                                       | -0.80 | -1.53  |
| <i>rasA</i>                  | AN0182  | Small monomeric GTPase of the Ras superfamily involved in regulation of development                                                                                  | -0.81 | -1.38  |
| <b>ors gene cluster</b>      |         |                                                                                                                                                                      |       |        |
| <i>orsD</i>                  | AN7913  | Protein of unknown function                                                                                                                                          | 2.64  | 23.06  |
| <i>orsB</i>                  | AN7911  | Putative amidohydrolase                                                                                                                                              | 2.32  | 158.75 |
| <i>orsC</i>                  | AN7912  | Putative tyrosinase                                                                                                                                                  | 2.28  | 21.19  |
| <i>orsE</i>                  | AN7914  | Putative alcohol dehydrogenase                                                                                                                                       | 1.58  | 57.62  |
| <i>orsA</i>                  | AN7909  | Polyketide synthase                                                                                                                                                  | 1.57  | 120.33 |
| <b>atn gene cluster</b>      |         |                                                                                                                                                                      |       |        |
|                              | AN7877  | RTA-like protein                                                                                                                                                     | 0.87  | 1.37   |
|                              | AN7875  | Protein of unknown function                                                                                                                                          | 1.09  | 4.23   |
|                              | AN7883  | Protein of unknown function                                                                                                                                          | 1.04  | 119.22 |
| <b>dba gene cluster</b>      |         |                                                                                                                                                                      |       |        |
| <i>cipB</i>                  | AN7895  | Putative oxidoreductase                                                                                                                                              | 0.89  | 14.48  |
| <i>dbaB</i>                  | AN7897  | FAD-binding monooxygenase with a role in secondary metabolism                                                                                                        | 0.80  | 997.83 |
| <i>dbaA</i>                  | AN7896  | Zn(II) <sub>2</sub> Cys <sub>6</sub> transcription factor with a role in secondary metabolite biosynthesis                                                           | 0.77  | 80.40  |
| <b>Cichorin gene cluster</b> |         |                                                                                                                                                                      |       |        |
|                              | AN6440  | Orthologue of <i>Aspergillus versicolor</i> Aspve1_0168042, <i>Aspergillus sydowii</i> Aspsy1_0031884 and <i>Aspergillus carbonarius</i> ITEM 5010 : Acar5010_000187 | 0.76  | 14.45  |
|                              | AN6441  | Protein of unknown function                                                                                                                                          | 0.77  | 6.97   |
| <i>cicE</i>                  | AN6447  | Predicted O-methyltransferase                                                                                                                                        | 0.62  | 1.13   |
|                              | AN6437  | Orthologue of <i>Aspergillus versicolor</i> Aspve1_0052718 and <i>Aspergillus sydowii</i>                                                                            | 1.04  | -1.31  |

|                         |        |                                                                                                                           |       |        |
|-------------------------|--------|---------------------------------------------------------------------------------------------------------------------------|-------|--------|
|                         |        | Aspsy1_0031878                                                                                                            |       |        |
| <b>stc gene cluster</b> |        |                                                                                                                           |       |        |
| <i>stcO</i>             | AN7811 | Sterigmatocystin biosynthesis protein with a role in sterigmatocystin/aflatoxin biosynthesis                              | 0.58  | -1.93  |
| <i>stcI</i>             | AN7816 | Sterigmatocystin biosynthesis lipase/esterase with a role in sterigmatocystin/aflatoxin biosynthesis                      | 0.59  | 1.21   |
| <i>stcE</i>             | AN7821 | Norsolorinic acid reductase with a role in sterigmatocystin/aflatoxin biosynthesis                                        | 0.48  | 1.47   |
| <b>mdp gene cluster</b> |        |                                                                                                                           |       |        |
| <i>mdpD</i>             | AN0147 | Flavin-containing monooxygenase                                                                                           | 0.57  | 1.14   |
| <b>eas gene cluster</b> |        |                                                                                                                           |       |        |
| <i>easD</i>             | AN2549 | Acyl-CoA ligase; required for emericellamide biosynthesis; emericellamide ( <i>eas</i> ) biosynthetic gene cluster member | -1.07 | -20.90 |
| <i>easC</i>             | AN2548 | Acyltransferase                                                                                                           | -0.58 | -14.23 |

694

695 **Table 2.** List of strains used in this study.

| Strain                             | Genotype                                                               | Reference             |
|------------------------------------|------------------------------------------------------------------------|-----------------------|
| <b><i>Aspergillus nidulans</i></b> |                                                                        |                       |
| A1153                              | <i>yA1, pabaA1; argB2; pyroA4, nkuA::bar</i>                           | Nayak et al., 2006    |
| A1153 <i>gcnE-3xflag</i>           | <i>yA1, pabaA1; gcnE::gcnEp-gcnE-3x-flag-pabaA1; pyroA4, nkuA::bar</i> | Nützmann et al., 2011 |
| A1153Δ <i>cpcA</i>                 | <i>yA1, pabaA1; cpcA::argB2; pyroA4,</i>                               | This study            |

| Strain                                              | Genotype                                                                             | Reference                                 |
|-----------------------------------------------------|--------------------------------------------------------------------------------------|-------------------------------------------|
|                                                     | <i>nkuA::bar</i>                                                                     |                                           |
| A1153Δ <i>basR</i>                                  | <i>yA1, pabaA1; basR::argB2; pyroA4, nkuA::bar</i>                                   | This study                                |
| A1153 <i>tet</i> <sup>On</sup> - <i>basR</i>        | <i>yA1, pabaA1; argB2::pabaA1-tet</i> <sup>On</sup> - <i>basR; pyroA4, nkuA::bar</i> | This study                                |
| <b><i>Aspergillus sydowii</i></b>                   |                                                                                      |                                           |
| CBS 593.65                                          |                                                                                      | Westerdijk Fungal Bio Diversity Institute |
| <i>tet</i> <sup>On</sup> - <i>basR</i>              | Ectopic integration of pUC18 <i>tet</i> <sup>ON</sup> - <i>basR-hph</i>              | This study                                |
| <b><i>Streptomyces rapamycinicus</i> ATCC 29253</b> |                                                                                      | Kumar and Goodfellow, 2008                |
| <b><i>Streptomyces lividans</i> TK24</b>            |                                                                                      | Kieser et al., 2000                       |

696

697

698

699

700

701

702 **Legends to the Figures**

703

704 **Figure 1. Genome-wide coverage plot of the merged fungal-bacterial genome with**  
705 **indication of H3(Cterm) and acetylated H3 (K9 and K14). For each condition, CHIP-seq**  
706 **analyses of three independent samples were performed. (A)** Genome-wide analysis  
707 covering all chromosomes. Data for each chromosome, *i.e.*, I to VIII are shown. X axis  
708 corresponds to genome coordinates of the fused genome in Mb. Y axis corresponds to the  
709 number of reads mapping within equally sized windows (bins) which segment the fused  
710 genome at a resolution of 50 kb for each library separately (see methods for details). The  
711 reads count value is plotted at the midpoint of each bin which were then connected by lines.  
712 Gene density is reported likewise by counting the number of genes for each bin instead of  
713 reads. Background values derive from *S. rapamycinicus* and *A. nidulans* grown in  
714 monoculture. The red arrow indicates the location of the *ors* gene cluster. **(B)** Zoom into  
715 chromosome II. The red lines mark the *ors* gene cluster. Data of three replicates are shown,  
716 which show the same tendency. Overall intensity of background, H3K9ac, H3K14ac and  
717 H3(Cterm) compared between *A. nidulans* mono culture (grey) and co-culture (blue) as well  
718 as the average genome density (black). **(C)** IGB screenshot of the *ors* gene cluster shown at  
719 the bottom of the figure labeled with black arrows. Blank gene arrows indicate genes not  
720 belonging to the *ors* gene cluster. Data obtained from monocultures of the fungus are  
721 depicted in blue, from co-cultivation in green and background data in grey.

722

723 **Figure 2. Normalized read counts derived from differential chromatin state (DCS) analysis**  
724 **obtained for the *ors* genes based on H3, H3K14ac and H3K9ac CHIP-seq. Data were**

725 generated for the area 500 bp down- and 1000 bp upstream from the TSS. Depicted bars  
726 are calculated from 3 data points.

727 **Figure 3. Read count frequencies for (A) TSS and (B) TTS.** Lines correspond to the relative  
728 enrichment of ChIP signal strength relative to the TSS/TTS averaged across all genes. ChIP-  
729 seq read count serves as a surrogate for signal strength (see methods for further details).  
730 Compared were the enrichment of histone H3 (black), H3K9ac (blue), H3K14ac (green) and  
731 the background control (grey) over an average of all TSS and TTS. The enrichment curves for  
732 all biological replicates are given, indicated by multiple lines per enrichment target.

733 **Figure 4. Relation between ChIP-seq and microarray data.** The blue lines resemble the  
734 linear regression line based on the differentially expressed genes with an adjusted  $p$ -value of  
735  $< 0.1$  including the confidence interval shown in grey. (A) LFC of H3K14ac plotted against LFC  
736 of H3K9ac. Dots depicted in dark grey and green mark differentially expressed genes and *ors*  
737 cluster genes, respectively. (B) Pairwise comparison of log fold changes (LFCs) of H3,  
738 H3K14ac and H3K9ac data with microarray data obtained during co-cultivation of *A. nidulans*  
739 with *S. rapamycinicus*.

740

741 **Figure 5. Normalized ChIP-seq read counts were used to quantify chromatin state for**  
742 **individual genes.** Here, for H3, H3K14ac and H3K9ac libraries nitrogen metabolism genes  
743 were shown. Counts were obtained by counting reads mapping to the promoter area for  
744 each gene that is 500 bp down- and 1000 bp upstream from the TSS. Depicted bars are  
745 calculated from 3 data points.

746 **Figure 6. Characterization of nitrogen metabolism genes and genes with mitochondrial**  
747 **function.** (A) Categorization of genes with FungiFun2 differentially lower acetylated at H3K9.

748 Nitrogen metabolism genes and genes with mitochondrial function are shaded in blue and  
749 green, respectively. **(B)** Transcription analysis of randomly selected genes of primary and  
750 secondary nitrogen metabolism by qRT-PCR during co-cultivation. Relative mRNA levels were  
751 measured after 3 h and normalized to the  $\beta$ -actin gene expression. The transcription of *orsA*  
752 was used as a positive control. **(C)** Metabolic activity comparing fungal co-cultivation with  
753 monocultures of *A. nidulans* and *S. rapamycinicus*. Metabolic activity was determined using a  
754 resazurin assay. Data were normalised to medium. The black line shows the time points that  
755 are significantly different between *A. nidulans* and the co-cultivation of *A. nidulans* with *S.*  
756 *rapamycinicus*. \*\*\*  $p < 0.001$

757  
758 **Figure 7. Expression of cross-pathway control regulatory genes, amino acid concentrations**  
759 **and their effect on SM production.** **(A)** Transcription of *cpcA* and *jlbA* determined by qRT-  
760 PCR after 3h of co-cultivation. Relative mRNA levels were compared to  $\beta$ -actin gene  
761 expression. **(B)** HPLC-based detection of orsellinic acid (1) and lecanoric acid (2) in  
762 supernatants of *A. nidulans* cultures treated with 3-AT. **(C)** Intracellular amino acid  
763 concentration of *A. nidulans* in monoculture and co-culture with *S. rapamycinicus*. Co-  
764 cultivation with *S. lividans* and addition of *S. rapamycinicus* after 24 h of cultivation served as  
765 negative controls. Furthermore, before extraction of amino acids the fungus (post  
766 cultivation) was also supplemented with *S. rapamycinicus* to exclude a bias resulting from  
767 the bacterial amino acids. Threonine, histidine, phenylalanine, arginine, asparagine and  
768 glutamine displaying differential concentrations in co-culture with the fungus are highlighted  
769 in grey.

770 **Figure 8. The Myb-like transcription factor BasR of *A. nidulans* is required for *S.***  
771 ***rapamycinicus*-triggered regulation of SMs.** **(A)** Relative transcript levels of *ors* cluster genes

772 *orsA* and *orsD* in  $\Delta$ *basR* mutant strain and *tet*<sup>On</sup>-*basR* overexpression strain. Transcript  
773 levels were measured by qRT-PCR normalized to  $\beta$ -actin transcript levels. **(B)** HPLC-based  
774 detection of orsellinic acid and lecanoric acid in wild-type strain, *basR* deletion mutant and  
775 *basR* overexpression strain. **(C)** Visualization of ions  $m/z$  646.3 and  $m/z$  662.3 <sup>+/-</sup> 1 Da,  
776 potentially corresponding to  $[M+Na]^+$  and  $[M+K]^+$  of emericellamide E/F ( $C_{32}H_{57}N_5O_7$ ;  
777 accurate mass 623.4258), by MALDI-MS imaging. Images corrected by median normalization  
778 and weak denoising.

779

780 **Figure 9. Fungal orsellinic acid gene clusters and their activation by BasR and the**  
781 **bacterium *S. rapamycinicus*. (A)** Alignment of the orsellinic acid gene clusters in the fungal  
782 species containing a *basR* homologue (*A. nidulans*, *A. sydowii*, *A. versicolor*), where *orsA*  
783 encodes the polyketide synthase, while *orsB-orsF* code for the tailoring enzymes. **(B)** LC-MS-  
784 based detection of orsellinic acid and lecanoric acid in the monoculture of the *A. sydowii*  
785 *basR* overexpression strain following induction with doxycycline (left) and during co-  
786 cultivation of *A. sydowii* and *S. rapamycinicus* (right). LC-MS profiles of the extracted ion  
787 chromatogram (EIC) are shown for  $m/z$  167  $[M - H]^-$ , which corresponds to orsellinic acid.  
788 Orsellinic acid (1) and lecanoric acid (2), detected *via* its fragmentation ion orsellinic acid.

789 **Figure 10. Model of the *S. rapamycinicus* – *A. nidulans* interaction.** Co-cultivation leads to  
790 nitrogen starvation and to reduced amino acid availability in the fungal cell. The lysine-  
791 acetyltransferase GcnE specifically acetylates (ac) lysine (K) 9 and 14 of histone H3 at the *ors*  
792 gene cluster and presumably at the *basR* gene promoter. As a consequence, *basR* is  
793 expressed. The deduced transcription factor BasR activates the *ors* gene cluster and  
794 suppresses (-) the expression of the emericellamide (*eas*) gene cluster. Only the presence of  
795 AdaB and GcnE in the Saga/Ada complex has been experimentally proven yet.



796 **Supplementary Material**

797

798

799 **Supplemental Results**

800 **Details of the ChIP analysis**

801 After first examination, we found that a significant proportion of co-incubated library reads  
802 originated from *S. rapamycinicus*. A fused genome concatenating the *A. nidulans* and the *S.*  
803 *rapamycinicus* genomes was generated. We found that about 90-98% of the reads mapped  
804 against the fused genome (Table S1), which suggested a high quality of sequencing data. This  
805 assumption was confirmed by examining the quality of libraries using FastQC (data not  
806 shown). As indicated, the coverage was substantially higher on the *S. rapamycinicus* genome  
807 with only ~20 % mapping to the *A. nidulans* genome (see Table S1). Expectedly, this ratio has  
808 shifted considerably towards *A. nidulans* genome for histone targeting ChIP libraries (Fig. 1  
809 A, panel 2 - 4) going up from 20 % to around 90 % for all H3, H3K9 and H314 libraries  
810 validating correct antibody enrichment as *S. rapamycinicus* is devoid of histones. However  
811 around 10 % of reads were still mapping to the *S. rapamycinicus* genome which might be  
812 due to imperfect antibody specificity. Coverage depth deviations were accounted for by only  
813 considering reads originating from *A. nidulans*. This allowed for calculation of library size  
814 factors used for library normalization. To assess antibody specificity, we calculated the  
815 fraction of reads mapping to mitochondria, which do not contain histones. The control  
816 library amounted to about 1.2 % of reads as opposed to about 2-5 % for H3, H3K9ac,  
817 H3K14ac libraries constituting 40-50 fold enrichment. In an effort to determine binding sites  
818 of GcnE during the microbial interaction, a strain harboring a 3xC-term-FLAG-tagged-GcnE  
819 was used in all conducted experiments. However, the mapping rates obtained for the ChIP-  
820 seq experiment with an antibody against FLAG-tag were too low and therefore excluded  
821 from the data analysis. As a background control we used ChIP material obtained from anti-

822 FLAG-tag antibody precipitates of a non-tagged fungal wild-type strain co-cultivated under  
823 the same conditions with *S. rapamycinicus*.

824

825 **Changes of H3K9 and H3K14 acetylation profiles in *A. nidulans* in response to *S.***  
826 ***rapamycinicus***

827 As reported in the manuscript, the genome-wide H3K9 and H3K14 chromatin landscape of *A.*  
828 *nidulans* was determined. There was also a drop-off in all libraries at the chromosome arms,  
829 which was most likely caused by the bordering bins being shorter and therefore account for  
830 less reads. As the gene density varies across the genome, spearman correlation was  
831 calculated to correlate the read counts and the gene counts among the 50k bins. As  
832 expected, there was almost no correlation between the background and the genes ( $r = 0.09$ ).  
833 However, for H3 we found it to be rather high ( $r = 0.37$ ). Since the used bin size is large, this  
834 could point at global H3 occupancy to be higher for high gene density regions such as  
835 euchromatin and low H3 occupancy for heterochromatin. Noteworthy, the correlation  
836 between read and gene density was found to be lower for H3K14ac and H3K9ac ( $r=0.14$  and  
837  $0.15$  respectively), which might indicate a more subtle regulatory mechanism for those  
838 marks targeting individual genes as opposed to larger domains. Notably, the highest  
839 correlation was found between the two acetylation marks ( $r=0.57$ ) hinting at some potential  
840 cross-talk or common regulation between them.

841

842 **Figure S1.** Correlation of data points for LFCs of ChIP-seq with LFCs of microarray data for all  
843 *A. nidulans* genes, depicting single data points and the correlation coefficient.

844 **Figure S2. Pairwise comparison of ChIP-seq and microarray intensities of all genes in A.**

845 *nidulans* monoculture. The numbers resemble the correlation coefficient for the respective  
846 comparison. Intensity defines enrichment of number of reads per gene.

847 **Figure S3. Histone H3 normalized read count frequencies for H3K9ac (green) and K14 ac**

848 **(blue) at the (A) TSS and (B) TTS.** The enrichment is given in signal to H3 ratio. Multiple lines

849 per ChIP target resemble the three independent biological replicates.

850 **Figure S4. Density plot of TSS (A, C, E) and TTS (B, D, F) given for different gene expression**

851 **levels (q1-q4).** (A, B) Specific enrichment of H3K9ac, (C, D) H3K14ac and (E, F) H3 is given in

852 read count frequency. Thereby q1 are the lower 25 %, q2 the medium lower 25 – 50 %, q3

853 are the medium high 50-75 %, q4 higher 25 %.

854 **Figure S5. Generation of *cpcA* deletion mutant and impact on the *ors* gene cluster**

855 **induction in response to *S. rapamycinicus*.** (A) Chromosomal organization of the *A. nidulans*

856 *cpcA* gene before and after deletion. The *cpcA* gene was replaced by an *argB* cassette in *A.*

857 *nidulans* wild-type strain A1153. Genomic DNA was digested with *NheI*. A PCR fragment

858 covering the downstream sequence of *cpcA* was used as a probe (\*). wt, wild-type strain as a

859 control. (B) LC-MS-based detection of orsellinic acid (1) and lecanoric acid (2) in the co-

860 cultivation of the *cpcA* deletion mutant and *S. rapamycinicus*.

861 **Figure S6. Molecular phylogenetic analysis of BasR (AN7174).** The tree reports distances

862 between BasR-similar amino acid sequences identified by BlastP analysis using the entire

863 sequences. The percentage of trees in which the associated taxa clustered together is shown

864 next to the branches. The BasR proteins from *A. nidulans*, *A. calidouustus*, *A. sydowii*, *A.*

865 *versicolor*, *A. rambellii* and *A. ochraceoroseus* form a separate clade (reported in purple),

866 while the yeast Bas1-related sequences are more distantly related to BasR (in red). The

867 second similar Myb-like transcription factor from *A. nidulans* (AN8377) forms a clade with  
868 orthologues from *A. calidoustus* and *A. versicolor* (in blue), which seems to be more related  
869 to Bas1 than to BasR. The names of the selected sequences are given according to their  
870 UniProt accession numbers.

871

872 **Figure S7. Generation of a *basR* deletion mutant and inducible overexpression strain based**  
873 **on the *A. nidulans* wild-type strain A1153. (A)** Genomic organization of *basR* and Southern  
874 blot analysis of *basR* deletion. The *basR* gene was replaced by the *argB* gene. Transformant  
875 strains were checked with a probe (\*) directed against the flanking region of the construct.  
876 Genomic DNA was digested with *Clal*. wt, wild-type strain as a control. **(B)** Generation of the  
877 inducible *basR* overexpression strain by complementation of the *basR* deletion strain. The  
878 *tet<sup>On</sup>-basR* gene cassette was integrated at the  $\Delta$ *basR* genomic locus using the *pabA1* gene  
879 as selectable marker replacing the *argB* marker. The genomic DNA was cut with *Bam*HI.  
880 Transformant strains were checked with a probe (\*) directed against the flanking region of  
881 the construct.

882 **Figure S8. Generation of the inducible *basR* overexpression strain by ectopic integration of**  
883 **an additional copy of the *basR* gene in the *A. sydowii* wild-type strain (wt).** The *tet<sup>On</sup>-basR*  
884 construct was integrated ectopically into the wild-type genome, using the *hph* cassette as  
885 selectable marker. For Southern blot analysis, transformant strains were checked with a  
886 probe (\*) directed against a region flanking the *tet<sup>On</sup>* cassette and *basR* gene. The genomic  
887 DNA was digested with *Bam*HI.

888

889 **Table S1.** Summary of ChIP-seq data

890 **Table S2.** List of primers used in this study.

## 891 References

- 892 AIYAR, P., SCHAEME, D., GARCÍA-ALTARES, M., CARRASCO-FLORES, D., DATHE, H., HERTWECK, C.,  
893 SASSO, S. & MITTAG, M. 2017. Antagonistic bacteria disrupt calcium homeostasis and  
894 immobilize algal cells. *Nat. Commun.*, in press.
- 895 ALLSHIRE, R. C. & EKWALL, K. 2015. Epigenetic regulation of chromatin states in *Schizosaccharomyces*  
896 *pombe*. *Cold Spring Harbor Perspect. Biol.*, 7, a018770.
- 897 ARAÚJO, F. D. D. S., ARAÚJO, W. L. & EBERLIN, M. N. 2017. Potential of *Burkholderia seminalis*  
898 TC3.4.2R3 as biocontrol agent against *Fusarium oxysporum* evaluated by mass spectrometry  
899 imaging. *J. Am. Soc. Mass. Spectrom.*, 28, 901-907.
- 900 BAKER, S. P. & GRANT, P. A. 2007. The SAGA continues: expanding the cellular role of a  
901 transcriptional co-activator complex. *Oncogene*, 26, 5329-5340.
- 902 BALLANCE, D. J. & TURNER, G. 1985. Development of a high-frequency transforming vector for  
903 *Aspergillus nidulans*. *Gene*, 36, 321-31.
- 904 BANNISTER, A. J. & KOUZARIDES, T. 2011. Regulation of chromatin by histone modifications. *Cell Res.*,  
905 21, 381-395.
- 906 BERGER, H., BASHEER, A., BÖCK, S., REYES-DOMINGUEZ, Y., DALIK, T., ALTMANN, F. & STRAUSS, J.  
907 2008. Dissecting individual steps of nitrogen transcription factor cooperation in the  
908 *Aspergillus nidulans* nitrate cluster. *Mol. Microbiol.*, 69, 1385-1398.
- 909 BRAKHAGE, A. A. 2013. Regulation of fungal secondary metabolism. *Nat. Rev. Microbiol.*, 11, 21-32.
- 910 BRAKHAGE, A. A. & VAN DEN BRULLE, J. 1995. Use of reporter genes to identify recessive trans-acting  
911 mutations specifically involved in the regulation of *Aspergillus nidulans* penicillin biosynthesis  
912 genes. *J. Bacteriol.*, 177, 2781-2788.
- 913 CÁNOVAS, D., MARCOS, A. T., GACEK, A., RAMOS, M. S., GUTIÉRREZ, G., REYES-DOMÍNGUEZ, Y. &  
914 STRAUSS, J. 2014. The histone acetyltransferase GcnE (GCN5) plays a central role in the  
915 regulation of *Aspergillus* asexual development. *Genetics*, 197, 1175-1189.
- 916 CUETO, M., JENSEN, P. R., KAUFFMAN, C., FENICAL, W., LOBKOVSKY, E. & CLARDY, J. 2001. Pestalone,  
917 a new antibiotic produced by a marine fungus in response to bacterial challenge. *J. Nat.*  
918 *Prod.*, 64, 1444-1446.
- 919 DAIGNAN-FORNIER, B. & FINK, G. R. 1992. Coregulation of purine and histidine biosynthesis by the  
920 transcriptional activators BAS1 and BAS2. *PNAS*, 89, 6746-6750.
- 921 DEMENTHON, K., PAOLETTI, M., PINAN-LUCARRÉ, B., LOUBRADOU-BOURGÉS, N., SABOURIN, M.,  
922 SAUPE, S. J. & CLAVÉ, C. 2003. Rapamycin mimics the incompatibility reaction in the fungus  
923 *Podospora anserina*. *Eukaryot Cell*, 2, 238-246.
- 924 DOCIMO, T., REICHEL, M., SCHNEIDER, B., KAI, M., KUNERT, G., GERSHENZON, J. & D'AURIA, J. C.  
925 2012. The first step in the biosynthesis of cocaine in *Erythroxylum coca*: the characterization  
926 of arginine and ornithine decarboxylases. *Plant Mol. Biol.*, 78, 599-615.
- 927 DOWNEY, M., JOHNSON, J. R., DAVEY, N. E., NEWTON, B. W., JOHNSON, T. L., GALAANG, S., SELLER,  
928 C. A., KROGAN, N. & TOCZYSKI, D. P. 2015. Acetylome profiling reveals overlap in the  
929 regulation of diverse processes by sirtuins, Gcn5, and Esa1. *Mol. Cell. Proteomics*, 14, 162-  
930 176.
- 931 EDGAR, R. C. 2004. MUSCLE: multiple sequence alignment with high accuracy and high throughput.  
932 *Nucleic Acids Res.*, 32, 1792-1797.
- 933 EIYAMA, A., KONDO-OKAMOTO, N. & OKAMOTO, K. 2013. Mitochondrial degradation during  
934 starvation is selective and temporally distinct from bulk autophagy in yeast. *FEBS Lett.*, 587,  
935 1787-1792.
- 936 EKBLÖM, R. & WOLF, J. B. W. 2014. A field guide to whole-genome sequencing, assembly and  
937 annotation. *Evol. Appl.*, 7, 1026-1042.
- 938 FENG, G. H. & LEONARD, T. J. 1998. Culture conditions control expression of the genes for aflatoxin  
939 and sterigmatocystin biosynthesis in *Aspergillus parasiticus* and *A. nidulans*. *Appl. Environ.*  
940 *Microbiol.*, 64, 2275-2277.

- 941 GACEK-MATTHEWS, A., BERGER, H., SASAKI, T., WITTSTEIN, K., GRUBER, C., LEWIS, Z. A. &  
942 STRAUSS, J. 2016. KdmB, a jumonji histone H3 demethylase, regulates genome-wide H3K4  
943 trimethylation and is required for normal induction of secondary metabolism in *Aspergillus*  
944 *nidulans*. *PLoS Genet.*, 12, e1006222.
- 945 GACEK, A. & STRAUSS, J. 2012. The chromatin code of fungal secondary metabolite gene clusters.  
946 *Appl. Microbiol. Biotechnol.*, 95, 1389-1404.
- 947 GEL, B., DÍEZ-VILLANUEVA, A., SERRA, E., BUSCHBECK, M., PEINADO, M. A. & MALINVERNI, R. 2016.  
948 regioneR: an R/Bioconductor package for the association analysis of genomic regions based  
949 on permutation tests. *Bioinformatics*, 32, 289-291.
- 950 GROSSO, A. R., DE ALMEIDA, S. F., BRAGA, J. & CARMO-FONSECA, M. 2012. Dynamic transitions in  
951 RNA polymerase II density profiles during transcription termination. *Genome Res.*, 22, 1447-  
952 1456.
- 953 HAYNES, B. C., SKOWYRA, M. L., SPENCER, S. J., GISH, S. R., WILLIAMS, M., HELD, E. P., BRENT, M. R. &  
954 DOERING, T. L. 2011. Toward an integrated model of capsule regulation in *Cryptococcus*  
955 *neoformans*. *PLoS Pathog.*, 7, e1002411.
- 956 HELMSCHROTT, C., SASSE, A., SAMANTARAY, S., KRAPPMANN, S. & WAGENER, J. 2013. Upgrading  
957 fungal gene expression on demand: improved systems for doxycycline-dependent silencing in  
958 *Aspergillus fumigatus*. *Appl. Environ. Microbiol.*, 79, 1751-1754.
- 959 HOFFMANN, T. & DORRESTEIN, P. C. 2015. Homogeneous matrix deposition on dried agar for MALDI  
960 imaging mass spectrometry of microbial cultures. *J. Am. Soc. Mass. Spectrom.*, 26, 1959-  
961 1962.
- 962 JIANG, C. & PUGH, B. F. 2009. Nucleosome positioning and gene regulation: advances through  
963 genomics. *Nat. Rev. Genet.*, 10, 161-172.
- 964 KANKI, T. & KLIONSKY, D. J. 2008. Mitophagy in yeast occurs through a selective mechanism. *J. Biol.*  
965 *Chem.*, 283, 32386-32393.
- 966 KAPLAN, N., MOORE, I., FONDUFE-MITTENDORF, Y., GOSSETT, A. J., TILLO, D., FIELD, Y., HUGHES, T.  
967 R., LIEB, J. D., WIDOM, J. & SEGAL, E. 2010. Nucleosome sequence preferences influence in  
968 vivo nucleosome organization. *Nat. Struct. Mol. Biol.*, 17, 918-922.
- 969 KAZAN, K., GARDINER, D. M. & MANNERS, J. M. 2012. On the trail of a cereal killer: recent advances  
970 in *Fusarium graminearum* pathogenomics and host resistance. *Mol. Plant Pathol.*, 13, 399-  
971 413.
- 972 KELLER, N. P. 2015. Translating biosynthetic gene clusters into fungal armor and weaponry. *Nat.*  
973 *Chem. Biol.*, 11, 671-677.
- 974 KIESER, T., BIBB, M. J., BUTTNER, M. J., CHATER, K. F. & HOPWOOD, D. A. 2000. *Practical Streptomyces*  
975 *genetics*, Norwich, United Kingdom, John Innes Foundation.
- 976 KIM, Y., ISLAM, N., MOSS, B. J., NANDAKUMAR, M. P. & MARTEN, M. R. 2011. Autophagy induced by  
977 rapamycin and carbon-starvation have distinct proteome profiles in *Aspergillus nidulans*.  
978 *Biotechnol. Bioeng.*, 108, 2705-2715.
- 979 KRAPPMANN, S. & BRAUS, G. H. 2005. Nitrogen metabolism of *Aspergillus* and its role in  
980 pathogenicity. *Med. Mycol.*, 43, S31-S40.
- 981 KUMAR, Y. & GOODFELLOW, M. 2008. Five new members of the *Streptomyces violaceusniger* 16S  
982 rRNA gene clade: *Streptomyces castelarensis* sp. nov., comb. nov., *Streptomyces*  
983 *himastatinicus* sp. nov., *Streptomyces mordarskii* sp. nov., *Streptomyces rapamycinicus* sp.  
984 nov. and *Streptomyces ruanii* sp. nov. *Int. J. Syst. Evol. Microbiol.*, 58, 1369-78.
- 985 MACHELEIDT, J., MATTERN, D. J., FISCHER, J., NETZKER, T., WEBER, J., SCHROECKH, V., VALIANTE, V. &  
986 BRAKHAGE, A. A. 2016. Regulation and role of fungal secondary metabolites. *Annu. Rev.*  
987 *Genet.*, 50, 371-392.
- 988 MEWS, P., ZEE, B. M., LIU, S., DONAHUE, G., GARCIA, B. A. & BERGER, S. L. 2014. Histone methylation  
989 has dynamics distinct from those of histone acetylation in cell cycle reentry from quiescence.  
990 *Mol. Cell. Biol.*, 34, 3968-3980.
- 991 NAYAK, T., SZEWCZYK, E., OAKLEY, C. E., OSMANI, A., UKIL, L., MURRAY, S. L., HYNES, M. J., OSMANI,  
992 S. A. & OAKLEY, B. R. 2006. A versatile and efficient gene-targeting system for *Aspergillus*  
993 *nidulans*. *Genetics*, 172, 1557-1566.

- 994 NETZKER, T., FISCHER, J., WEBER, J., MATTERN, D. J., KÖNIG, C. C., VALIANTE, V., SCHROECKH, V. &  
995 BRAKHAGE, A. A. 2015. Microbial communication leading to the activation of silent fungal  
996 secondary metabolite gene clusters. *Front. Microbiol.*, 6, 299.
- 997 NIEHAUS, E.-M., VON BARGEN, K. W., ESPINO, J. J., PFANNMÜLLER, A., HUMPF, H.-U. & TUDZYNSKI,  
998 B. 2014. Characterization of the fusaric acid gene cluster in *Fusarium fujikuroi*. *Appl.*  
999 *Microbiol. Biotechnol.*, 98, 1749-1762.
- 1000 NÜTZMANN, H.-W., FISCHER, J., SCHERLACH, K., HERTWECK, C. & BRAKHAGE, A. A. 2013. Distinct  
1001 amino acids of histone H3 control secondary metabolism in *Aspergillus nidulans*. *Appl.*  
1002 *Environ. Microbiol.*, 79, 6102-6109.
- 1003 NÜTZMANN, H.-W., REYES-DOMINGUEZ, Y., SCHERLACH, K., SCHROECKH, V., HORN, F., GACEK, A.,  
1004 SCHÜMANN, J., HERTWECK, C., STRAUSS, J. & BRAKHAGE, A. A. 2011. Bacteria-induced  
1005 natural product formation in the fungus *Aspergillus nidulans* requires Saga/Ada-mediated  
1006 histone acetylation. *PNAS*, 108, 14282-14287.
- 1007 PENN, M. D., GALGOCI, B. & GREER, H. 1983. Identification of AAS genes and their regulatory role in  
1008 general control of amino acid biosynthesis in yeast. *PNAS*, 80, 2704-2708.
- 1009 PINSON, B., KONGSRUD, T. L., ORDING, E., JOHANSEN, L., DAIGNAN-FORNIER, B. & GABRIELSEN, O. S.  
1010 2000. Signaling through regulated transcription factor interaction: mapping of a regulatory  
1011 interaction domain in the Myb-related Bas1p. *Nucleic Acids Res.*, 28, 4665-4673.
- 1012 ROBINSON, M. D. & OSHLACK, A. 2010. A scaling normalization method for differential expression  
1013 analysis of RNA-seq data. *Genome Biol.*, 11, R25.
- 1014 SACHS, M. S. 1996. General and cross-pathway controls of amino acid biosynthesis. In: BRAMBL, R. &  
1015 MARZLUF, G. A. (eds.) *Biochemistry and Molecular Biology*. Berlin, Heidelberg: Springer Berlin  
1016 Heidelberg.
- 1017 SCHERLACH, K. & HERTWECK, C. 2009. Triggering cryptic natural product biosynthesis in  
1018 microorganisms. *Org. Biomol. Chem.*, 7, 1753-1760.
- 1019 SCHERLACH, K., SARKAR, A., SCHROECKH, V., DAHSE, H.-M., ROTH, M., BRAKHAGE, A. A., HORN, U. &  
1020 HERTWECK, C. 2011. Two induced fungal polyketide pathways converge into antiproliferative  
1021 spiroanthrones. *ChemBioChem*, 12, 1836-1839.
- 1022 SCHERLACH, K., SCHUEMANN, J., DAHSE, H.-M. & HERTWECK, C. 2010. Aspernidine A and B,  
1023 prenylated isoindolinone alkaloids from the model fungus *Aspergillus nidulans*. *J. Antibiot.*,  
1024 63, 375-377.
- 1025 SCHROECKH, V., SCHERLACH, K., NÜTZMANN, H. W., SHELEST, E., SCHMIDT-HECK, W., SCHUEMANN,  
1026 J., MARTIN, K., HERTWECK, C. & BRAKHAGE, A. A. 2009. Intimate bacterial-fungal interaction  
1027 triggers biosynthesis of archetypal polyketides in *Aspergillus nidulans*. *PNAS*, 106, 14558-63.
- 1028 SMITH, K. M., PHATALE, P. A., SULLIVAN, C. M., POMRANING, K. R. & FREITAG, M. 2011.  
1029 Heterochromatin is required for normal distribution of *Neurospora crassa* CenH3. *Mol. Cell.*  
1030 *Biol.*, 31, 2528-2542.
- 1031 SPRINGER, C., KÜNZLER, M., BALMELLI, T. & BRAUS, G. H. 1996. Amino acid and adenine cross-  
1032 pathway regulation act through the same 5'-TGACTC-3' motif in the yeast HIS7 promoter. *J.*  
1033 *Biol. Chem.*, 271, 29637-29643.
- 1034 STACK, D., NEVILLE, C. & DOYLE, S. 2007. Nonribosomal peptide synthesis in *Aspergillus fumigatus*  
1035 and other fungi. *Microbiology*, 153, 1297-1306.
- 1036 STUDD, L., SCHMIDT, F. J., JAHN, L., SIEBER, C. M. K., CONNOLLY, L. R., NIEHAUS, E. M., FREITAG, M.,  
1037 HUMPF, H. U. & TUDZYNSKI, B. 2013. Two histone deacetylases, FfHda1 and FfHda2, are  
1038 important for *Fusarium fujikuroi* secondary metabolism and virulence. *Appl. Environ.*  
1039 *Microbiol.*, 79, 7719-7734.
- 1040 STUDD, L., WIEMANN, P., KLEIGREWE, K., HUMPF, H.-U. & TUDZYNSKI, B. 2012. Biosynthesis of  
1041 fusarubins accounts for pigmentation of *Fusarium fujikuroi* perithecia. *Appl. Environ.*  
1042 *Microbiol.*, 78, 4468-4480.
- 1043 SZEWCZYK, E., NAYAK, T., OAKLEY, C. E., EDGERTON, H., XIONG, Y., TAHERI-TALESH, N., OSMANI, S. A.  
1044 & OAKLEY, B. R. 2007. Fusion PCR and gene targeting in *Aspergillus nidulans*. *Nat. Protoc.*, 1,  
1045 3111-3120.

- 1046 TAMURA, K., STECHER, G., PETERSON, D., FILIPSKI, A. & KUMAR, S. 2013. MEGA6: molecular  
1047 evolutionary genetics analysis version 6.0. *Mol. Biol. Evol.*, 30, 2725-2729.
- 1048 THORVALDSDÓTTIR, H., ROBINSON, J. T. & MESIROV, J. P. 2013. Integrative genomics viewer (IGV):  
1049 high-performance genomics data visualization and exploration. *Briefings Bioinf.*, 14, 178-192.
- 1050 TUDZYNSKI, B. 2014. Nitrogen regulation of fungal secondary metabolism in fungi. *Front. Microbiol.*,  
1051 5, 656.
- 1052 VALERIUS, O., BRENDEL, C., WAGNER, C., KRAPPMANN, S., THOMA, F. & BRAUS, G. H. 2003.  
1053 Nucleosome position-dependent and -independent activation of *HIS7* expression in  
1054 *Saccharomyces cerevisiae* by different transcriptional activators. *Eukaryot Cell*, 2, 876-885.
- 1055 WATERS, R., VAN EIJK, P. & REED, S. 2015. Histone modification and chromatin remodeling during  
1056 NER. *DNA Repair*, 36, 105-113.
- 1057 WIEMANN, P. & KELLER, N. P. 2014. Strategies for mining fungal natural products. *J Ind Microbiol*  
1058 *Biotechnol*, 41, 301-313.
- 1059 WIEMANN, P., SIEBER, C. M. K., VON BARGEN, K. W., STUDDT, L., NIEHAUS, E.-M., ESPINO, J. J., HUß,  
1060 K., MICHELSE, C. B., ALBERMANN, S., WAGNER, D., BERGNER, S. V., CONNOLLY, L. R.,  
1061 FISCHER, A., REUTER, G., KLEIGREWE, K., BALD, T., WINGFIELD, B. D., OPHIR, R., FREEMAN, S.,  
1062 HIPPLER, M., SMITH, K. M., BROWN, D. W., PROCTOR, R. H., MÜNSTERKÖTTER, M., FREITAG,  
1063 M., HUMPF, H.-U., GÜLDENER, U. & TUDZYNSKI, B. 2013. Deciphering the cryptic genome:  
1064 genome-wide analyses of the rice pathogen *Fusarium fujikuroi* reveal complex regulation of  
1065 secondary metabolism and novel metabolites. *PLoS Pathog.*, 9, e1003475.
- 1066 YU, G., WANG, L.-G. & HE, Q.-Y. 2015. CHIPseeker: an R/Bioconductor package for CHIP peak  
1067 annotation, comparison and visualization. *Bioinformatics*, 31, 2382-2383.
- 1068 ZHANG, F., KIROUAC, M., ZHU, N., HINNEBUSCH, A. G. & ROLFES, R. J. 1997. Evidence that complex  
1069 formation by Bas1p and Bas2p (Pho2p) unmask the activation function of Bas1p in an  
1070 adenine-repressible step of ADE gene transcription. *Mol. Cell. Biol.*, 17, 3272-3283.
- 1071 ZHANG, Y., LIU, T., MEYER, C. A., EECKHOUTE, J., JOHNSON, D. S., BERNSTEIN, B. E., NUSBAUM, C.,  
1072 MYERS, R. M., BROWN, M., LI, W. & LIU, X. S. 2008. Model-based Analysis of CHIP-Seq  
1073 (MACS). *Genome Biol.*, 9, R137-R137.

1074  
1075  
1076  
1077  
1078  
1079  
1080  
1081  
1082  
1083  
1084  
1085  
1086  
1087  
1088  
1089  
1090  
1091  
1092  
1093  
1094  
1095



1096  
1097  
1098

Figures

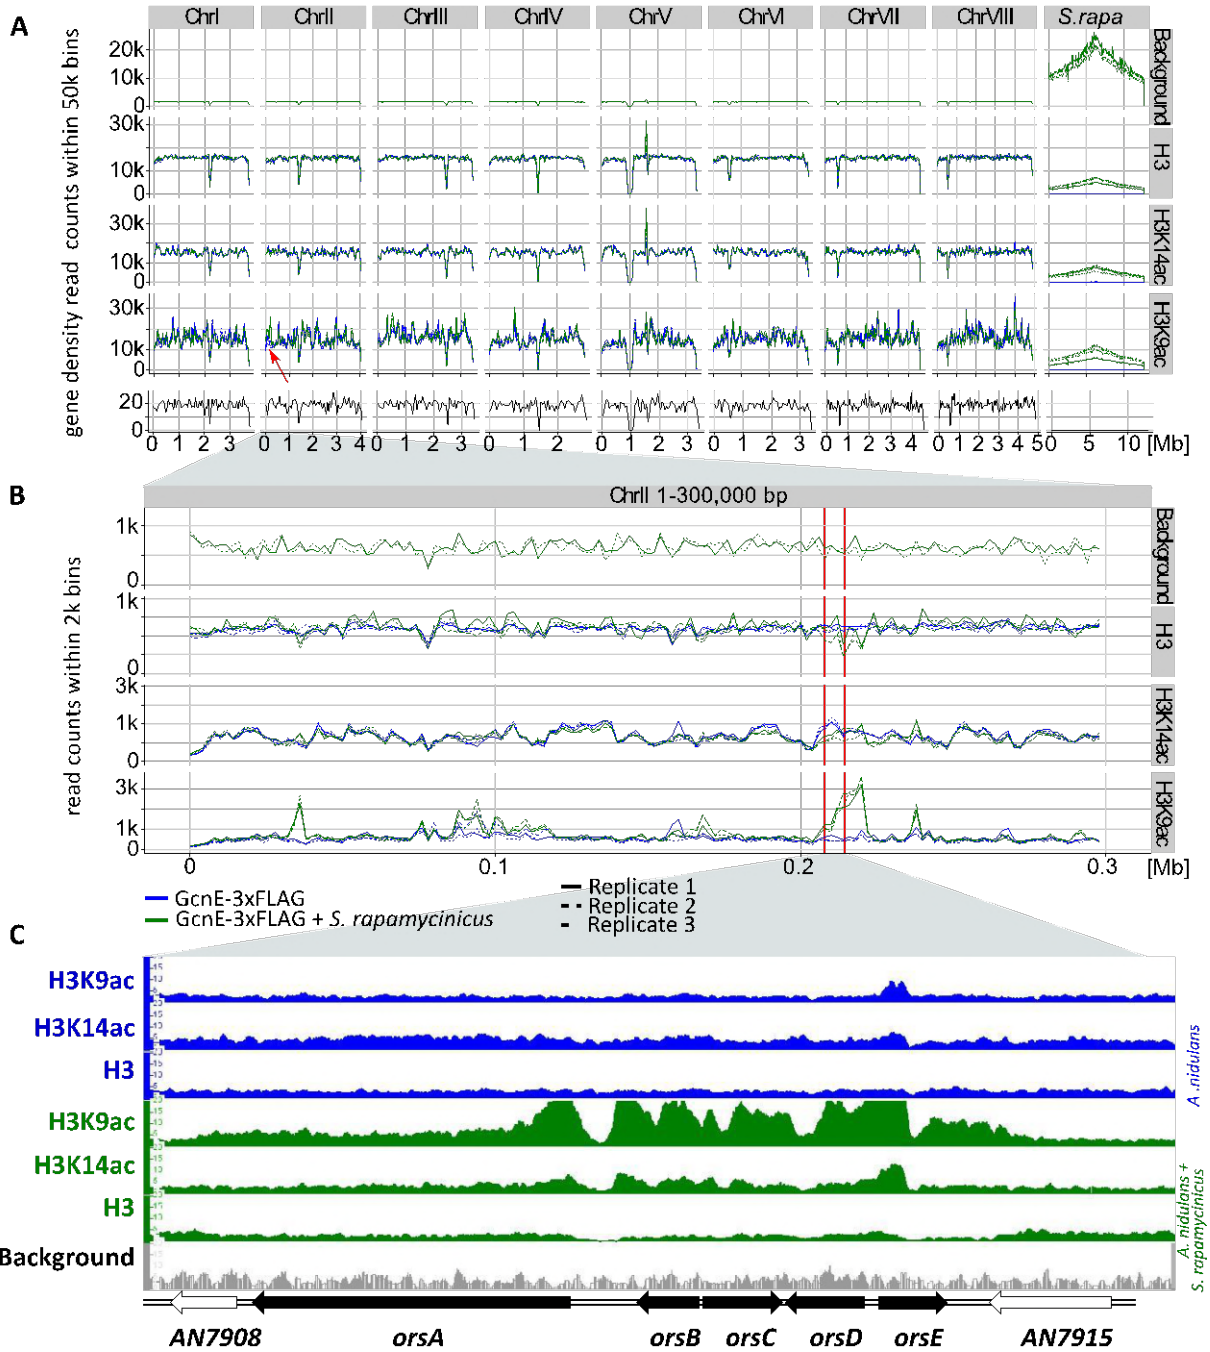

1099  
1100

Figure 1

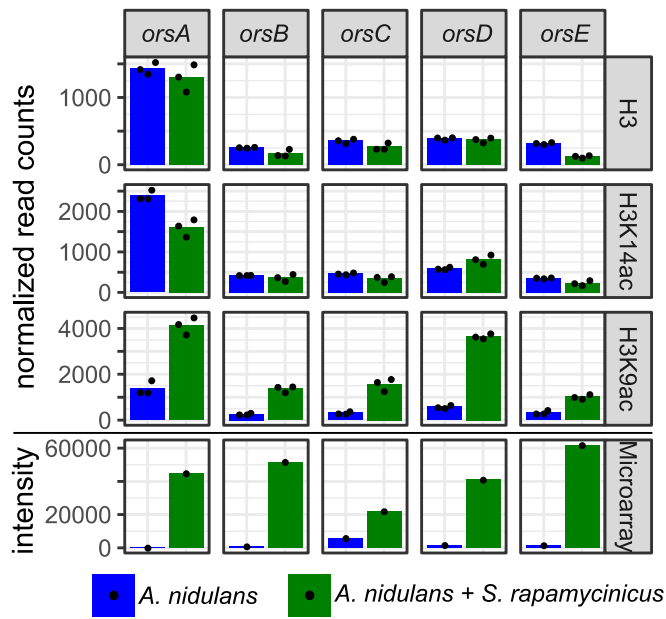

1101  
1102

Figure 2

1103

1104

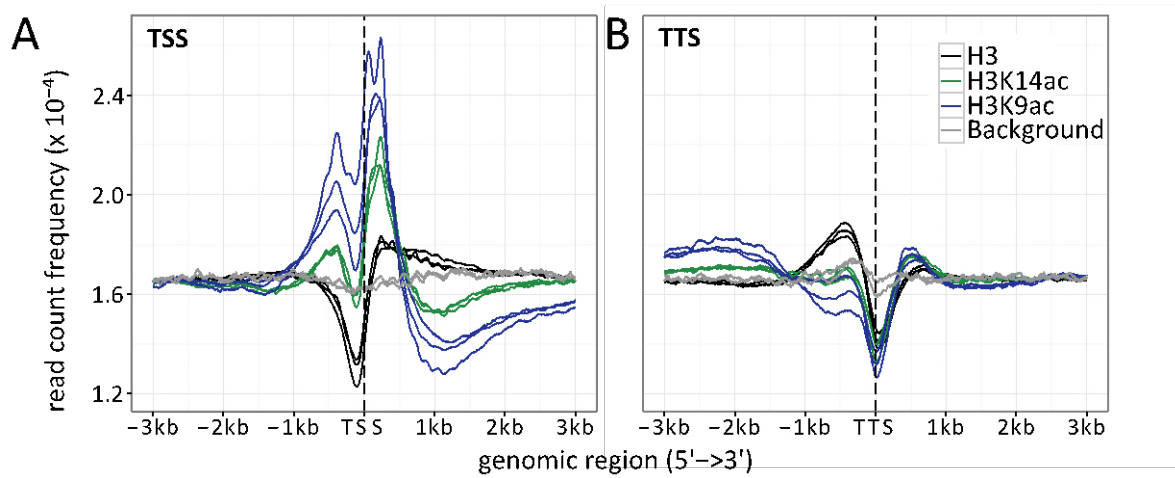

1105  
1106

Figure 3

1107

1108

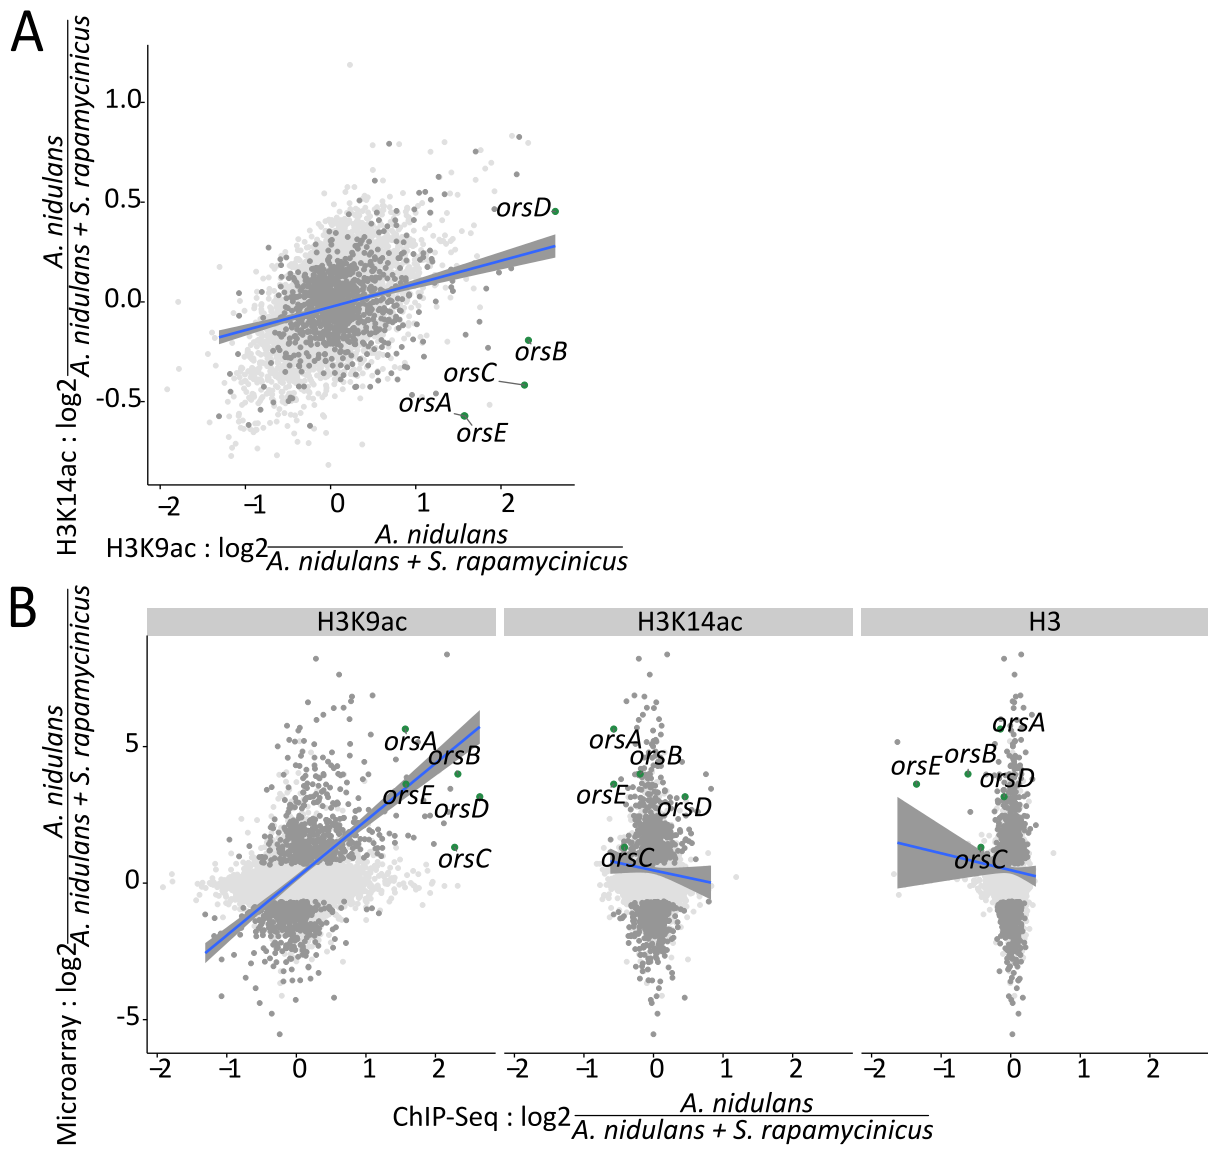

1109

1110

**Figure 4**

1111

1112

1113

1114

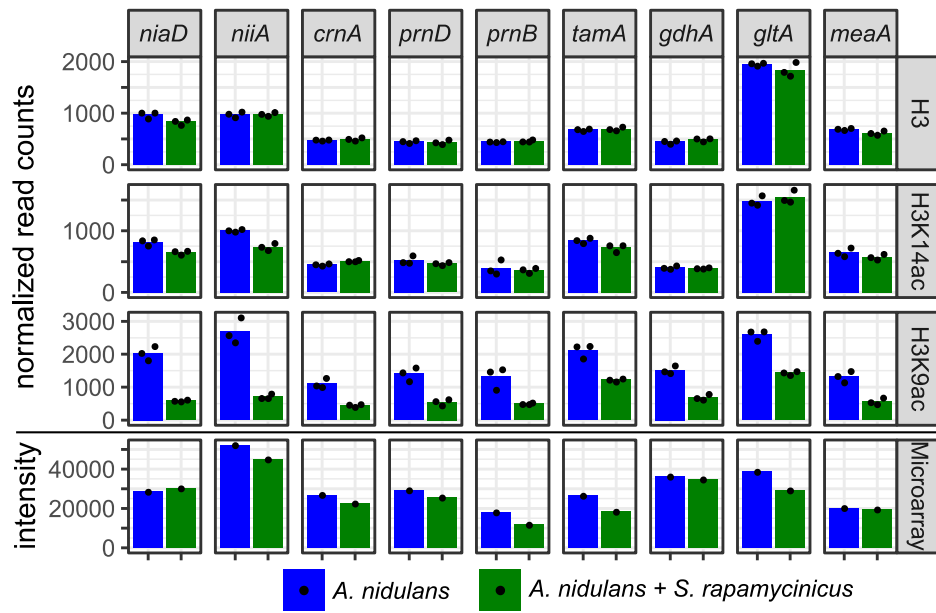

1115

1116 **Figure 5**

A

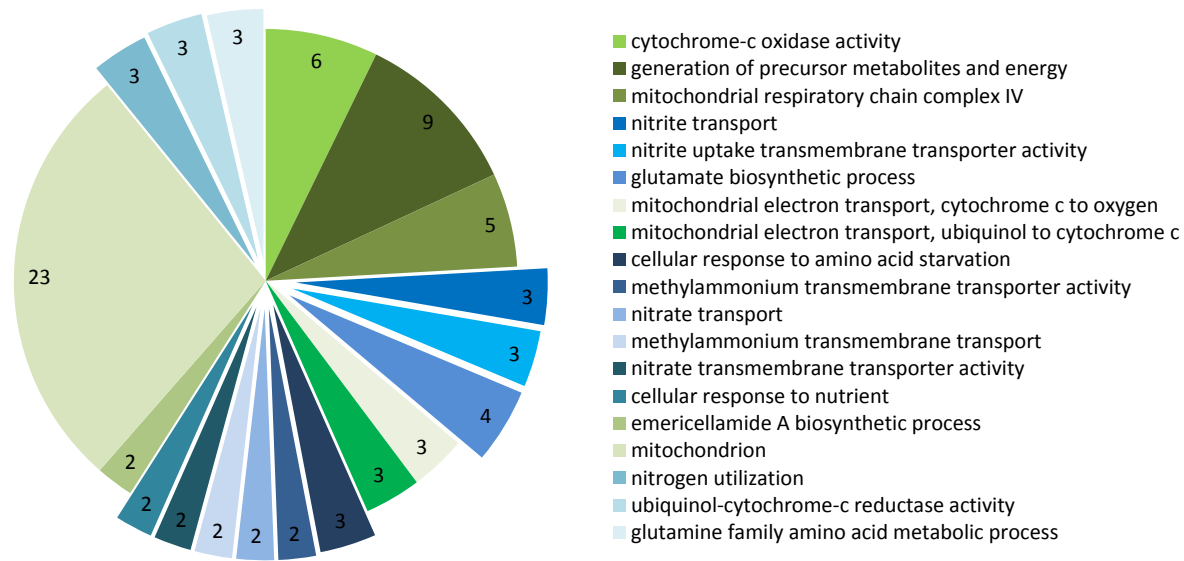

B

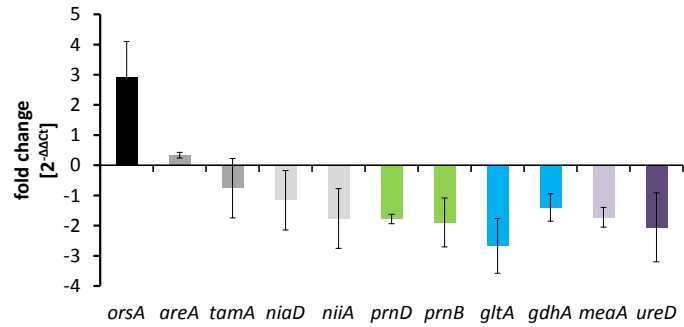

C

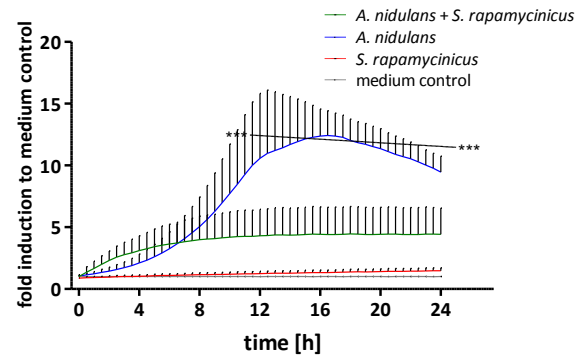

1117

1118 **Figure 6**

1119

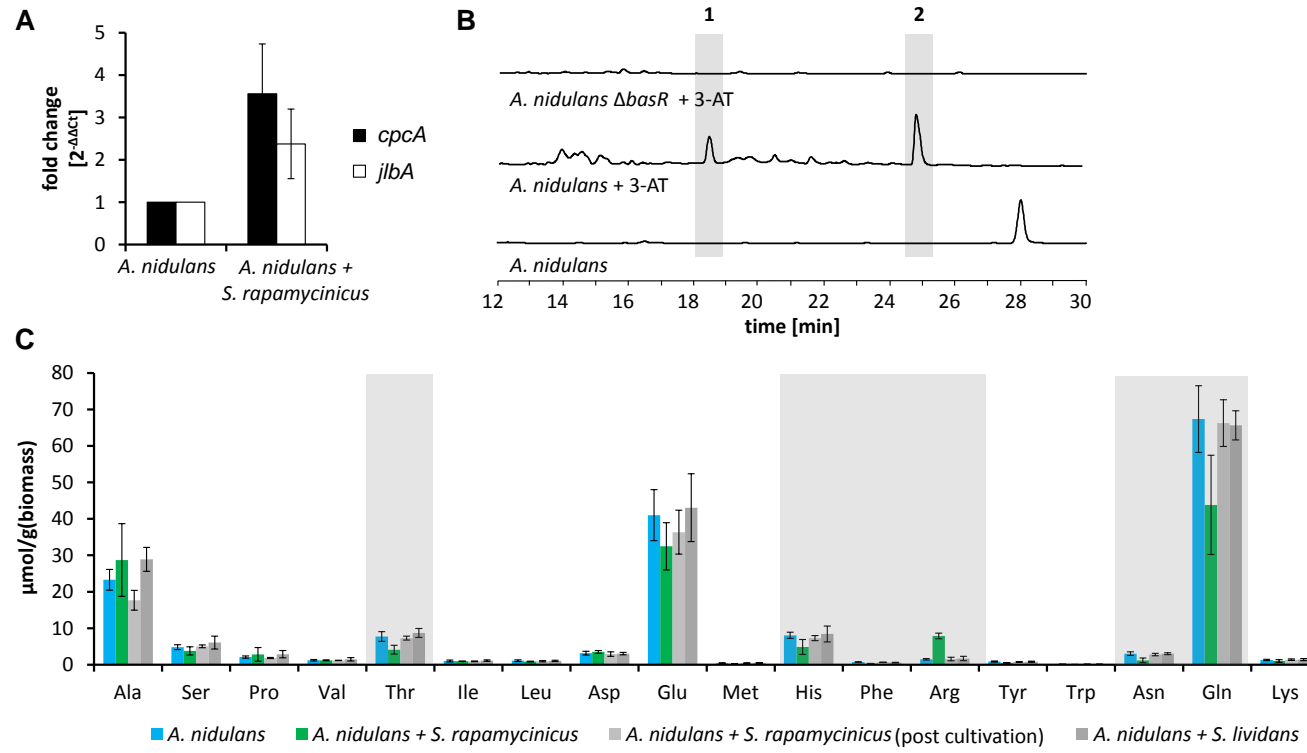

1120

1121 **Figure 7**

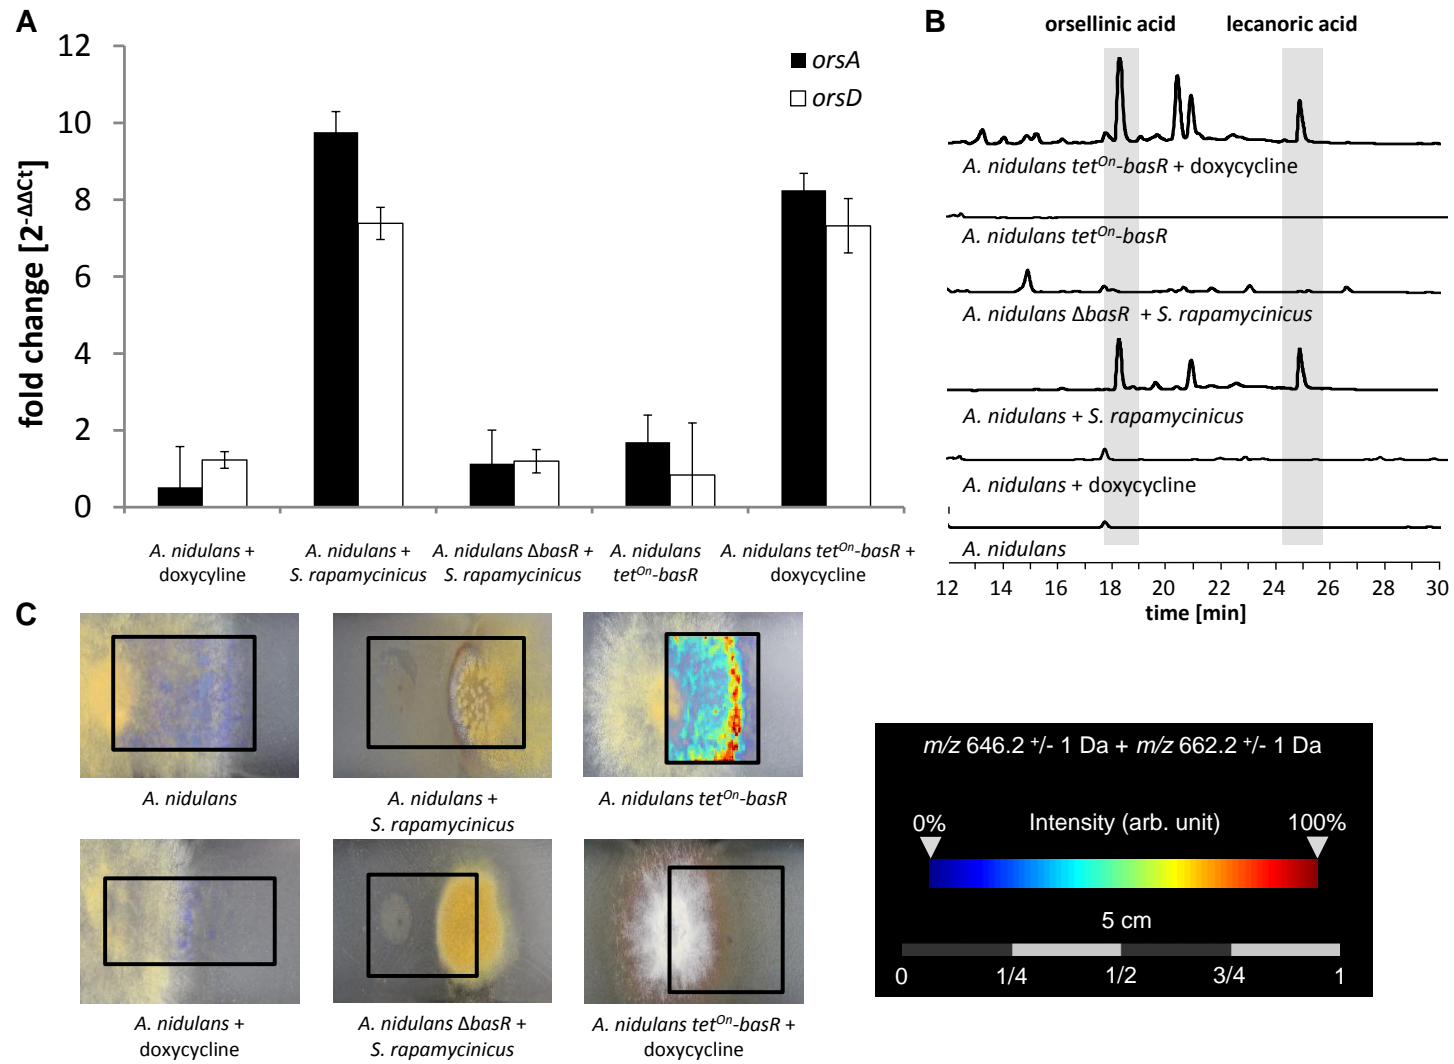

1122

1123 **Figure 8**

1124

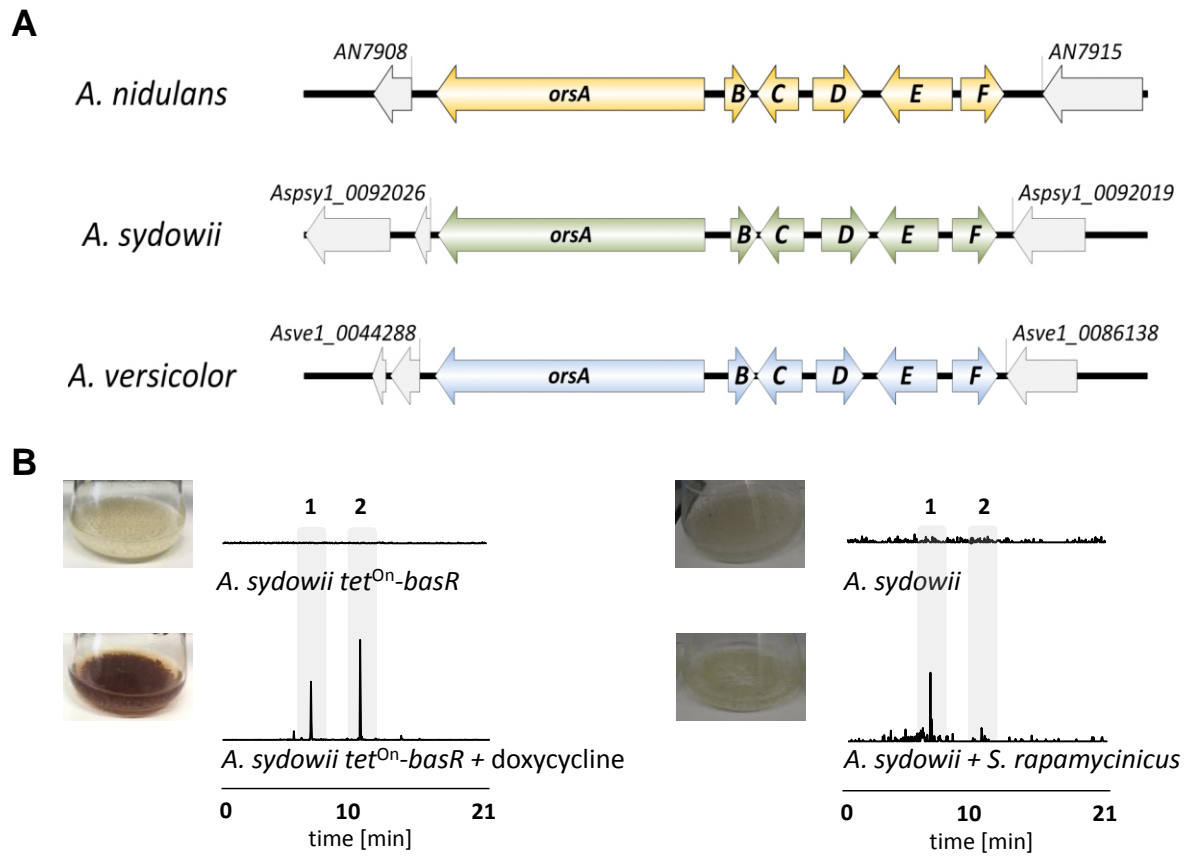

1125  
1126  
1127  
1128

**Figure 9**



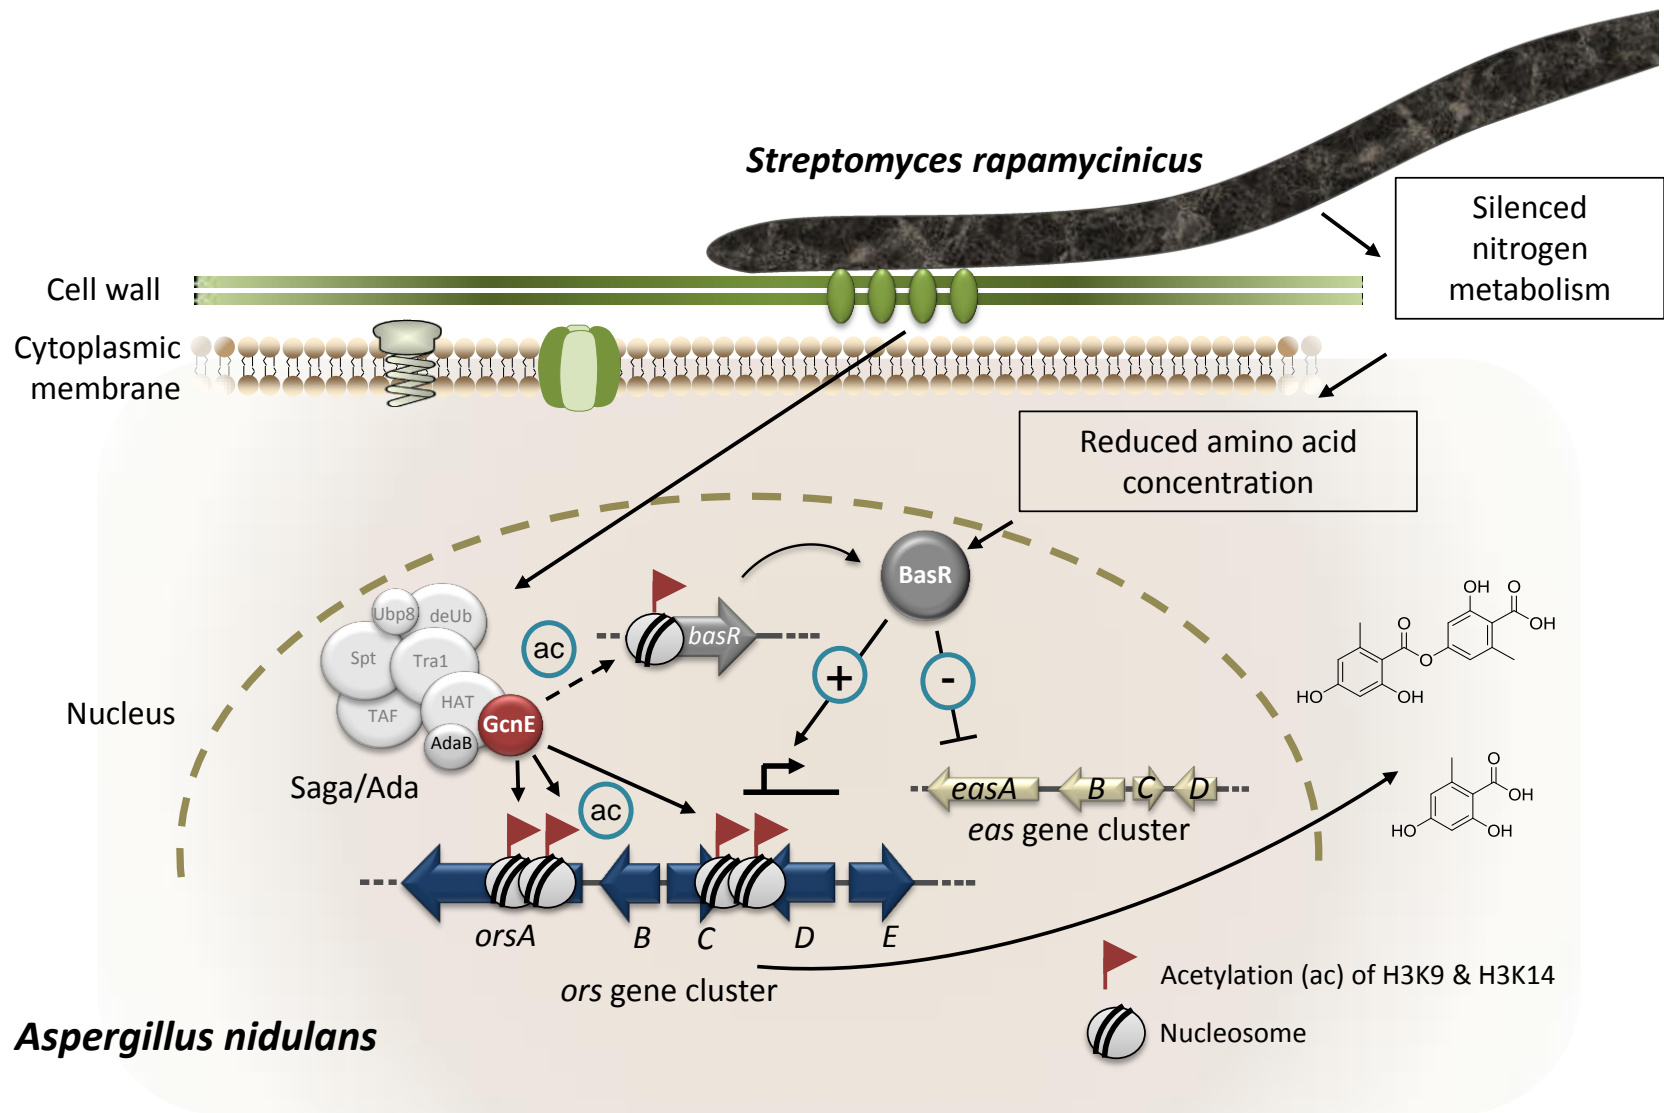

1129  
1130

Figure 10

1131

ChIP-seq/ Microarray  $\log_2$  fold change for all genes:  
*A. nidulans* vs. *A. nidulans* + *S. rapamycinicus*

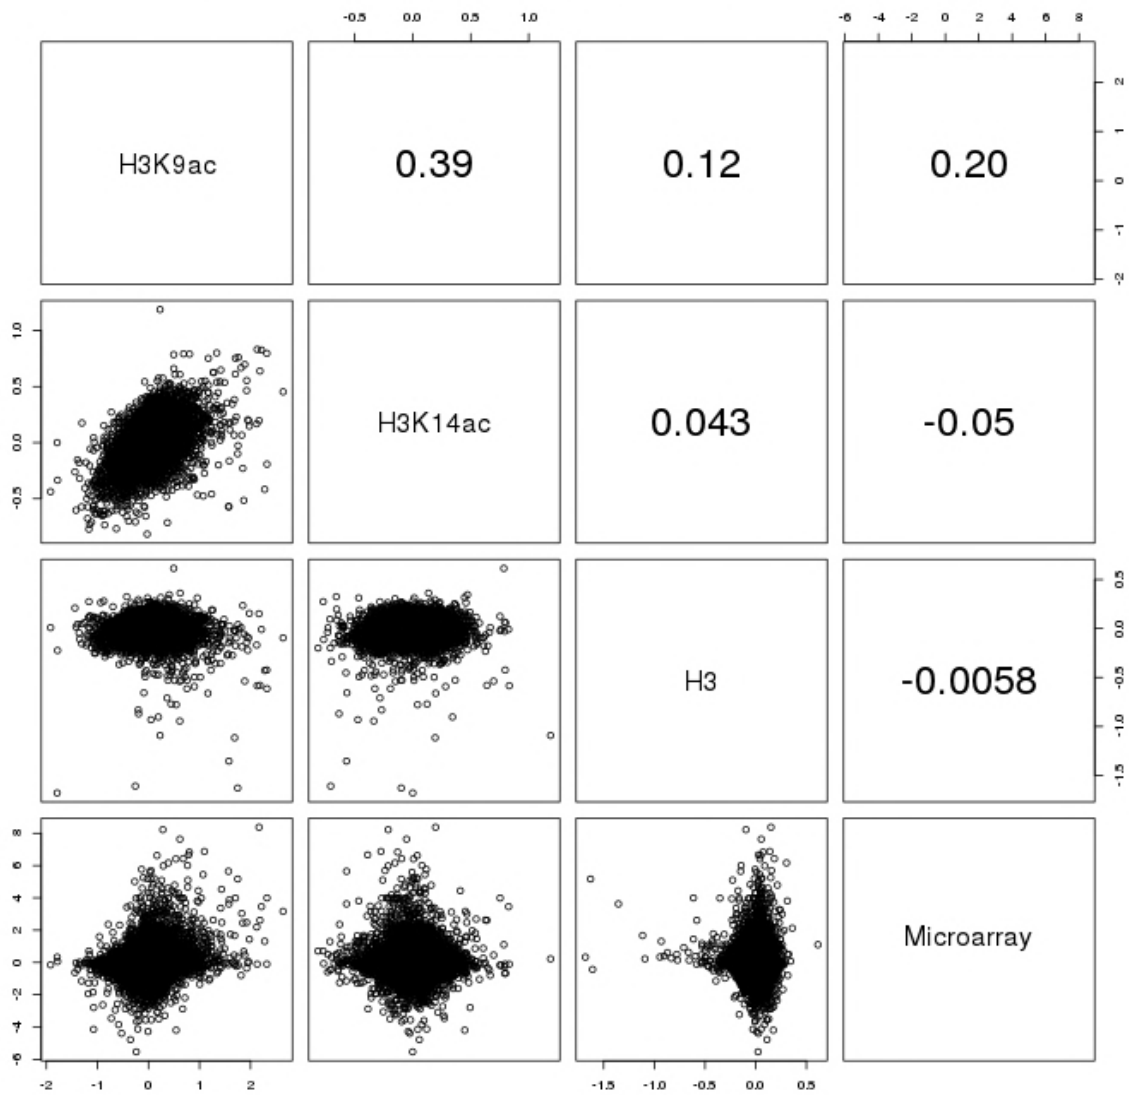

1132

1133 **Figure S1.**

1134

### ChIP-seq enrichment microarray expression level

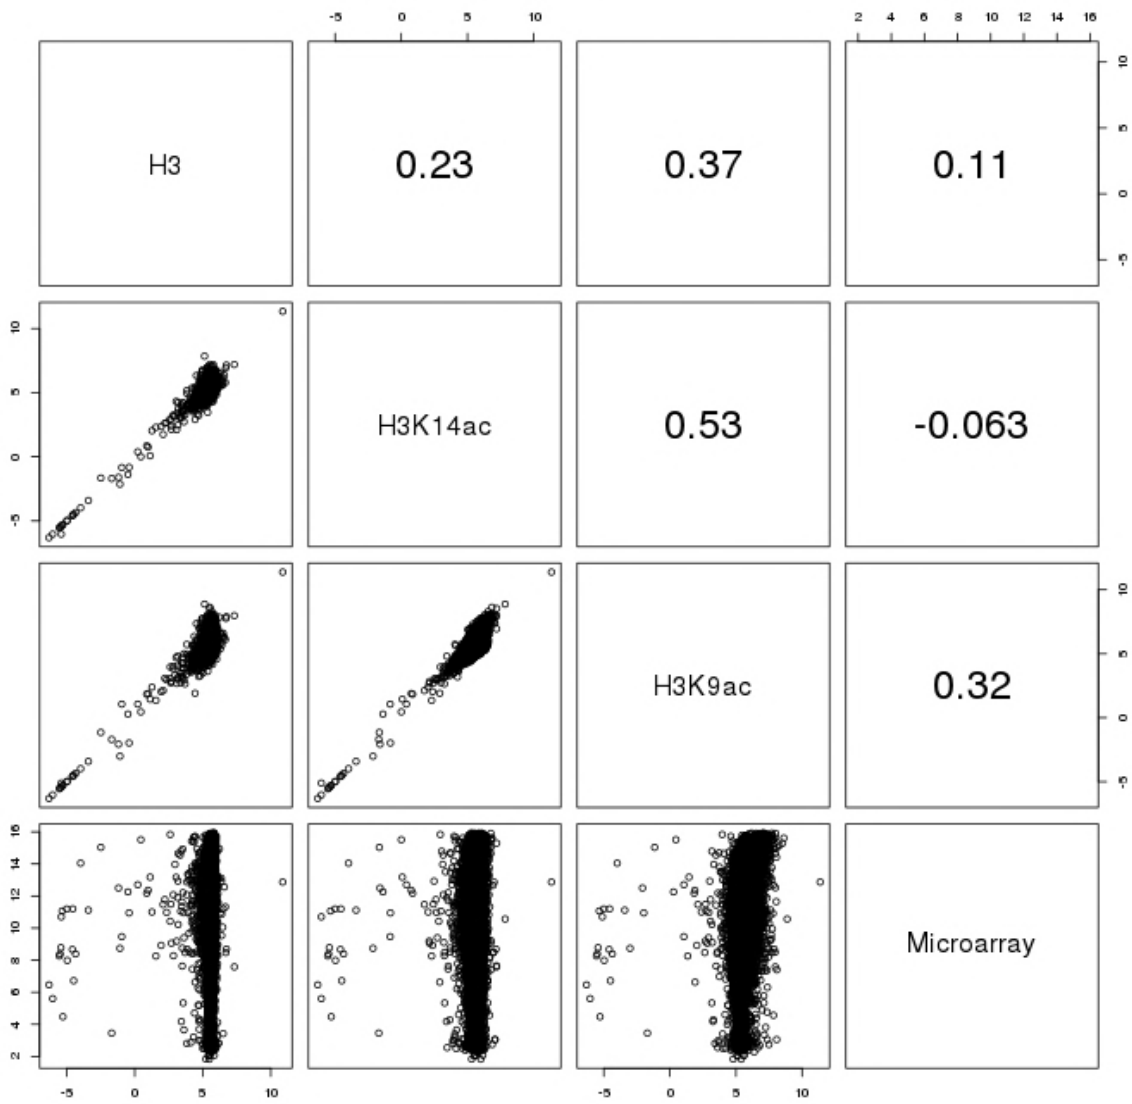

1135

1136 **Figure S2.**

1137

1138

1139

1140

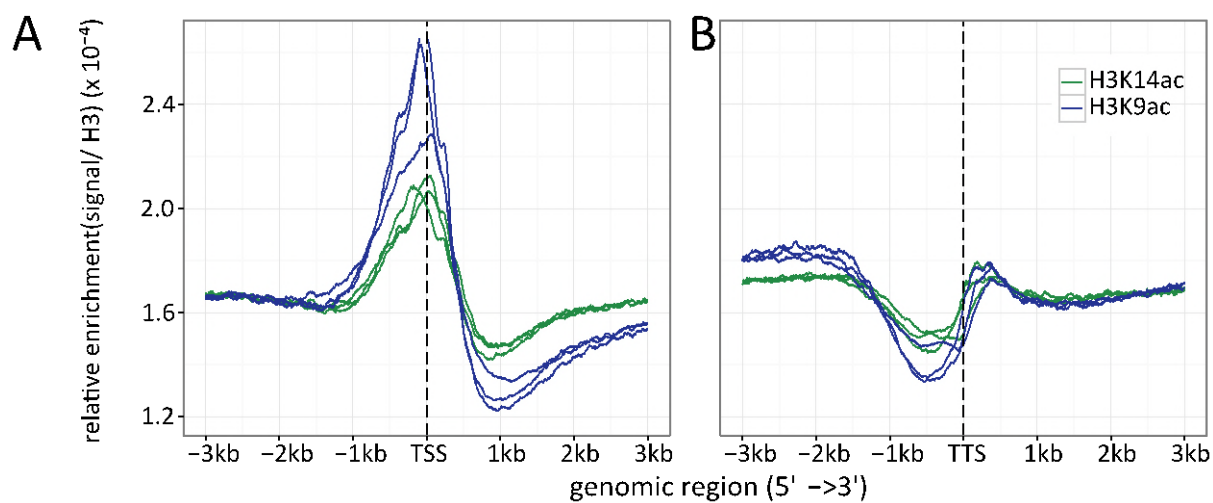

1141

1142

**Figure S3.**

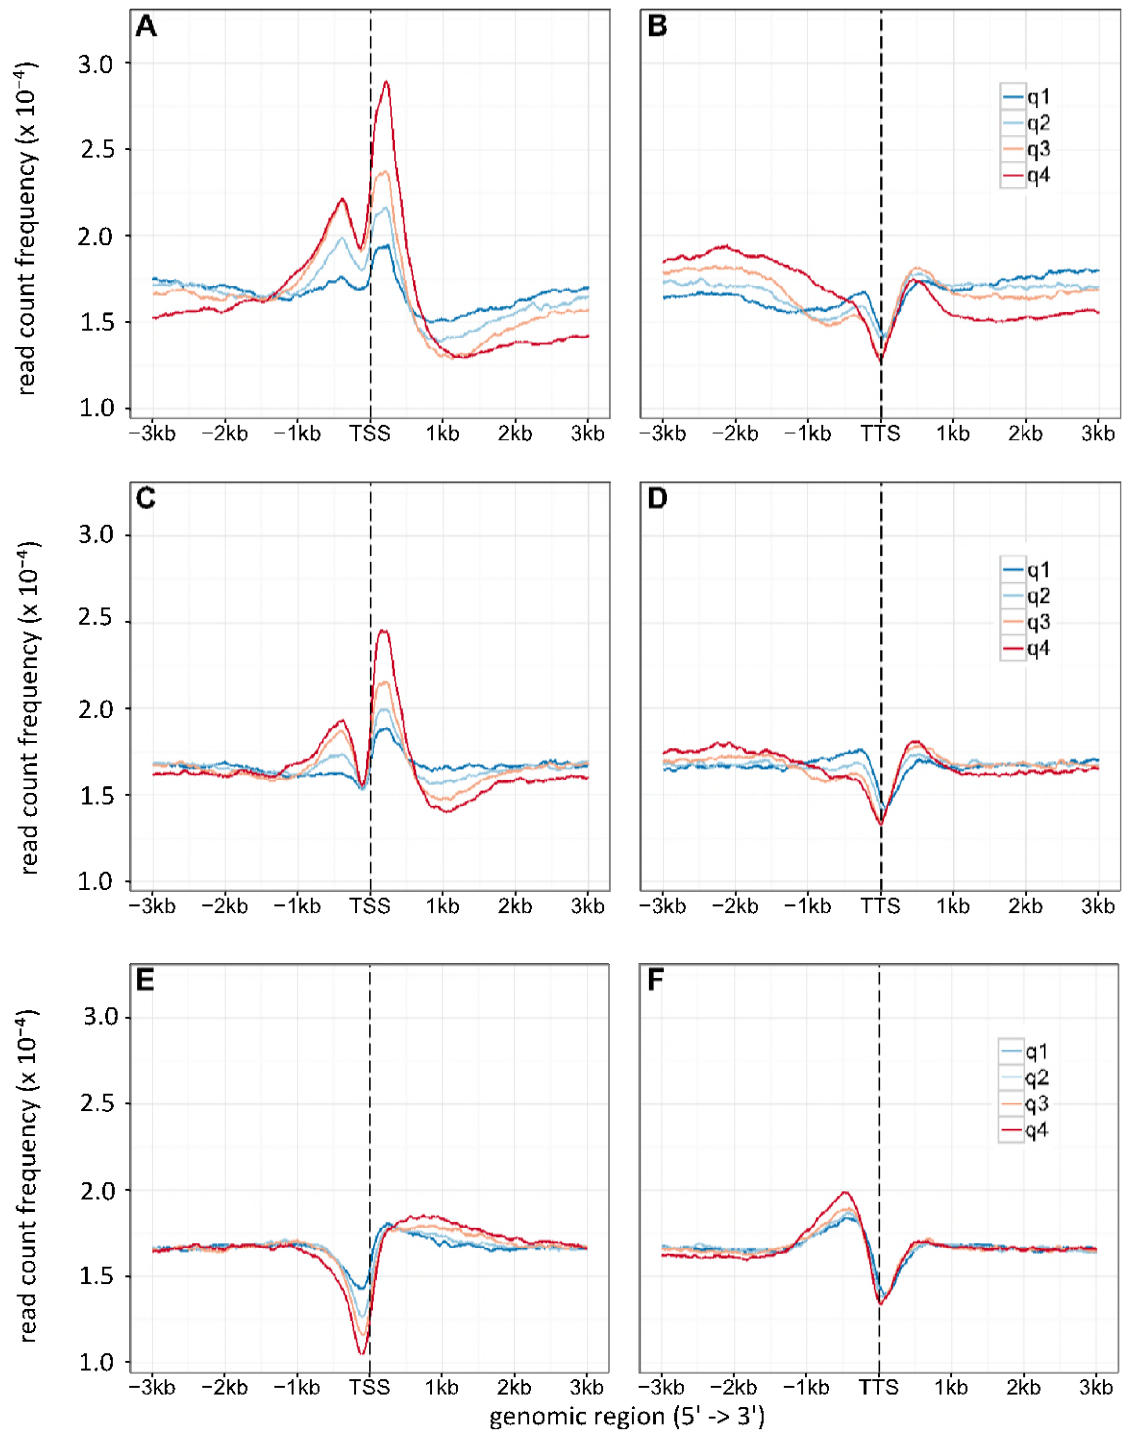

1143

1144 **Figure S4.**

1145

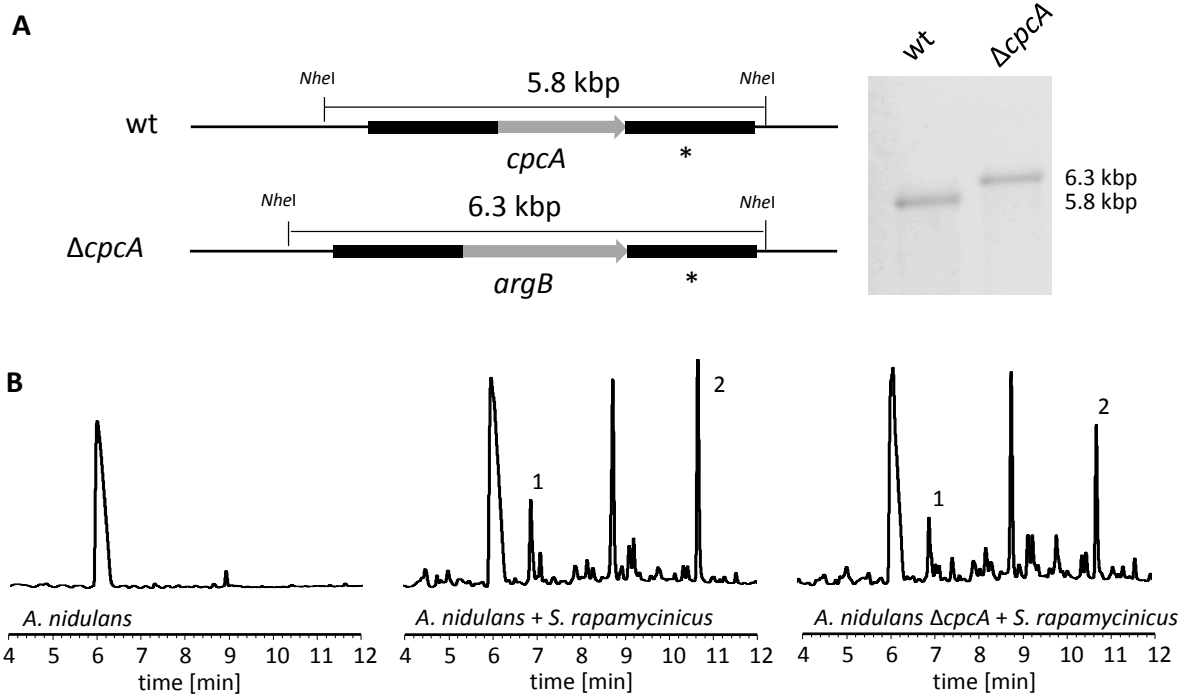

1146

1147 **Figure S5.**

1148

1149

1150

1151

1152

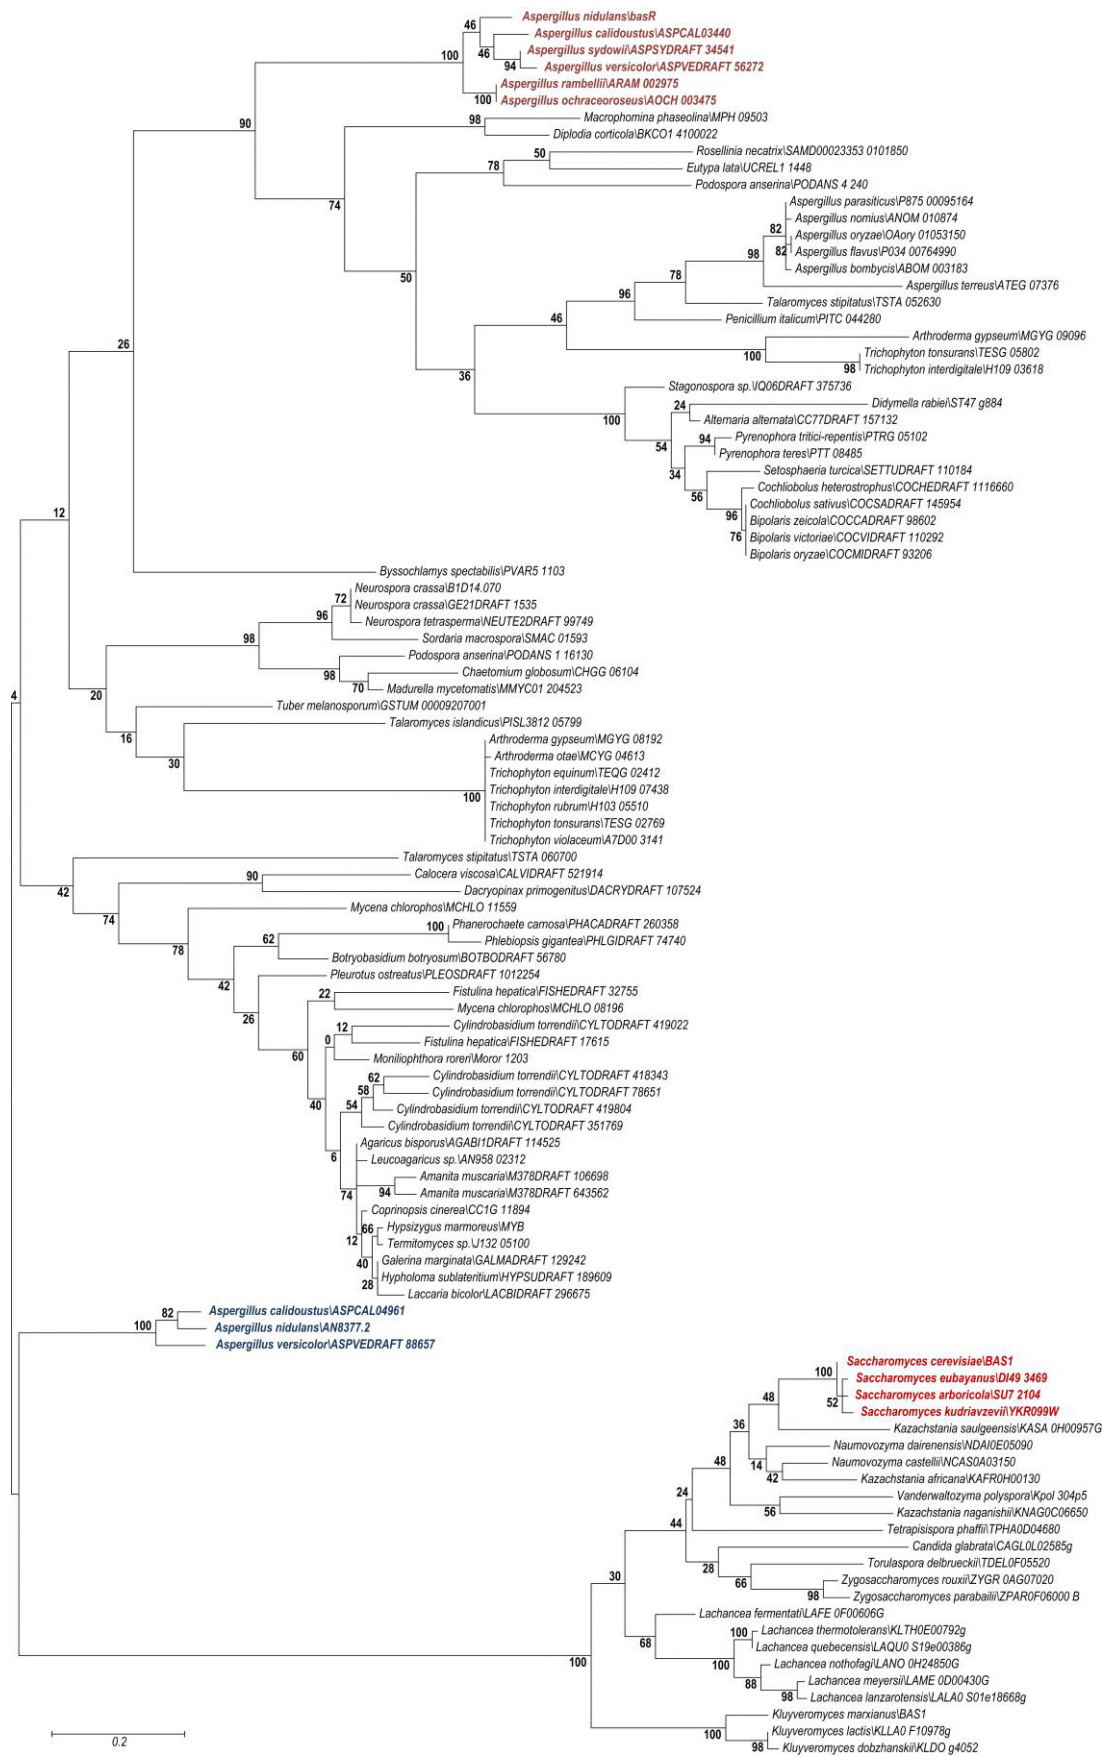

1153

1154 **Figure S6.**

A

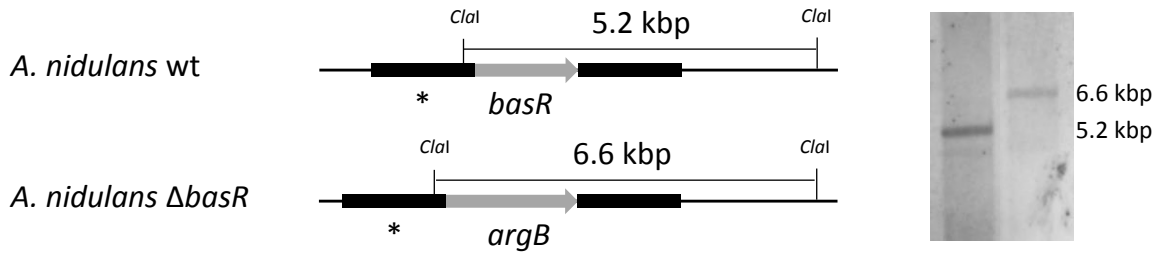

B

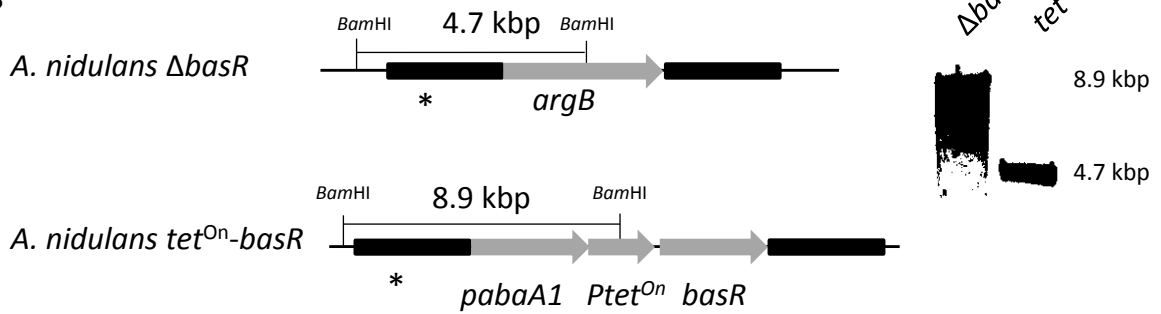

1155

1156 **Figure S7.**

1157

1158

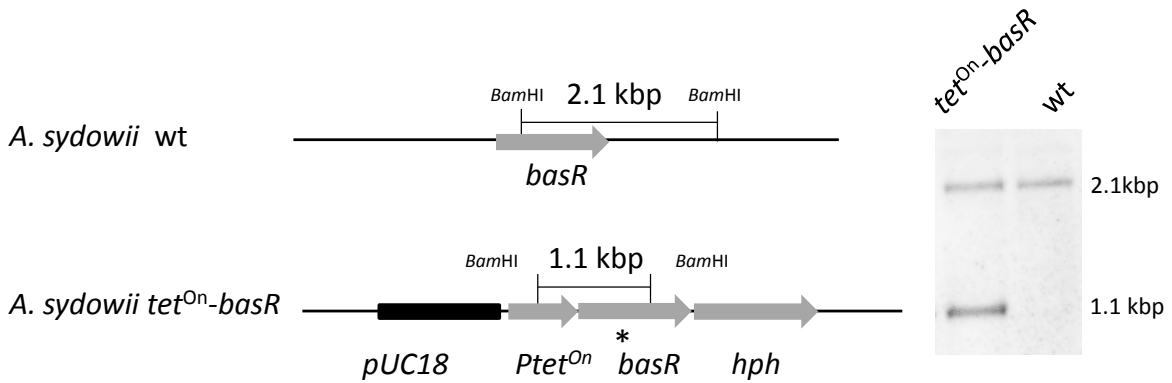

1159

1160 **Figure S8.**

1161

1162

1163



1164 **Table S1.** Summary of ChIP-seq data

| Sample                            | Mapping efficiency [%] | Total reads | Adaptor reads | Adaptor reads [%] | Unique reads | Uniqu e reads [%] | A. <i>nidulans</i> reads | Duplicate [%]           | Trimmed Duplicate [%]   | S. <i>rapamyci nicus</i> reads | A. <i>nidulans</i> [%] | S. <i>rapamyci nicus</i> [%] |
|-----------------------------------|------------------------|-------------|---------------|-------------------|--------------|-------------------|--------------------------|-------------------------|-------------------------|--------------------------------|------------------------|------------------------------|
| 25966_flagm2_rep<br>2_rap_fastqc  | 83.65                  | 6.740.753   | 2.049.874     | 30.4              | 2.499.561    | 37.3              | 112.408                  | 11.565.627.824.4<br>21  | 116.738.263.092.36<br>8 | 3.507.733                      | 16.68                  | 52.04                        |
| 25969_h3k9ac_rep<br>1_fastqc      | 96.99                  | 9.365.386   | 3.077.339     | 32.9              | 8.823.048    | 94.5              | 8.978.193                | 74.555.968.055.1<br>42  | 748.696.077.453.24<br>2 | 0.010012                       | 95.87                  | 0.11                         |
| 25970_h3k9ac_rep<br>1_rap_fastqc  | 96.64                  | 7.737.559   | 2.493.774     | 32.2              | 673.711      | 87.2              | 6.624.136                | 762.365.916.062.<br>742 | 764.078.025.056.82<br>8 | 0.768383                       | 85.61                  | 9.93                         |
| 25973_h3k9ac_rep<br>2_fastqc      | 98.3                   | 7.541.067   | 2.408.844     | 31.9              | 7.202.729    | 96                | 7.339.192                | 766.193.983.227.<br>339 | 768.284.051.621.33<br>6 | 0.004353                       | 97.32                  | 0.06                         |
| 25974_h3k9ac_rep<br>2_rap_fastqc  | 97.16                  | 10.890.871  | 3.538.308     | 32.5              | 9.079.848    | 83.5              | 8.728.609                | 79.173.675.786.2<br>47  | 794.933.998.378.40<br>3 | 1.681.602                      | 80.15                  | 15.44                        |
| 25977_h3k14ac_re<br>p1_fastqc     | 97.99                  | 4.975.966   | 1.603.206     | 32.2              | 4.781.717    | 96.1              | 4.862.224                | 901.966.216.764.<br>041 | 89.927.577.136.475      | 0.001007                       | 97.71                  | 0.02                         |
| 25978_h3k14ac_re<br>p1_rap_fastqc | 96.97                  | 5.558.179   | 174.768       | 31.4              | 4.790.822    | 86.4              | 4.669.582                | 905.974.181.288.<br>327 | 905.591.684.672.17<br>5 | 0.657575                       | 84.01                  | 11.83                        |

|                                      |       |            |           |      |          |      |          |                  |                    |           |       |       |
|--------------------------------------|-------|------------|-----------|------|----------|------|----------|------------------|--------------------|-----------|-------|-------|
| 25981_h3k14ac_re<br>p2_fastqc        | 97.75 | 7.848.049  | 2.524.433 | 32.2 | 7.513.98 | 95.9 | 7.631.19 | 86.972.883.667.0 | 867.813.459.068.81 | 0.002981  | 97.24 | 0.04  |
|                                      |       |            |           |      | 5        |      | 2        | 71               | 5                  |           |       |       |
| 25982_h3k14ac_re<br>p2_rap_fastqc    | 97.25 | 5.365.781  | 1.707.664 | 31.8 | 4.754.46 | 88.6 | 4.684.20 | 929.740.213.555. | 928.976.176.425.65 | 0.492044  | 87.3  | 9.17  |
|                                      |       |            |           |      | 2        |      | 1        | 733              | 6                  |           |       |       |
| 25985_h3cterm_re<br>p1_fastqc        | 98.3  | 16.575.311 | 5.464.365 | 33   | 15.852.3 | 95.8 | 16.218.3 | 813.944.725.279. | 817.243.581.056.88 | 0.005381  | 97.85 | 0.03  |
|                                      |       |            |           |      | 87       |      | 52       | 651              | 3                  |           |       |       |
| 25986_h3cterm_re<br>p1_rap_fastqc    | 97.16 | 6.507.174  | 213.572   | 32.8 | 5.727.62 | 88.5 | 5.686.60 | 9.017.548.780.94 | 90.727.567.964.291 | 0.549903  | 87.39 | 8.45  |
|                                      |       |            |           |      | 5        |      | 5        | 5                |                    |           |       |       |
| 25989_h3cterm_re<br>p2_fastqc        | 97.93 | 7.211.698  | 2.378.043 | 33   | 6.807.96 | 95.3 | 6.965.76 | 875.255.935.788. | 882.069.230.353.47 | 0.00427   | 96.59 | 0.06  |
|                                      |       |            |           |      | 8        |      | 6        | 041              | 8                  |           |       |       |
| 25990_h3cterm_re<br>p2_rap_fastqc    | 97.64 | 12.234.444 | 4.041.382 | 33   | 10.561.3 | 86.7 | 10.366.0 | 863.349.575.870. | 869.220.274.291.62 | 139.243   | 84.73 | 11.38 |
|                                      |       |            |           |      | 74       |      | 01       | 974              | 7                  |           |       |       |
| 25993_h3cterm_re<br>p3_fastqc        | 97.65 | 22.793.994 | 7.367.013 | 32.3 | 21.685.9 | 95.1 | 22.177.1 | 690.901.496.209. | 692.369.343.128.38 | 0.010104  | 97.29 | 0.04  |
|                                      |       |            |           |      | 33       |      | 24       | 322              | 9                  |           |       |       |
| 25994_h3cterm_re<br>p3_rap_fastqc    | 97.59 | 15.631.595 | 4.989.982 | 31.9 | 1.360.67 | 87.1 | 13.412.0 | 794.449.484.478. | 796.526.289.875.72 | 1.706.112 | 85.8  | 10.91 |
|                                      |       |            |           |      | 6        |      | 04       | 621              | 1                  |           |       |       |
| 25997_lane1_flagm<br>2_wt_rap_fastqc | 90.13 | 10.761.862 | 2.576.201 | 23.9 | 3.935.40 | 36.6 | 1.602.68 | 74.296.819.443.6 | 74.610.621.811.612 | 7.053.875 | 14.89 | 65.55 |
|                                      |       |            |           |      | 7        |      | 7        | 49               |                    |           |       |       |
| 26003_h3k9ac_rep<br>3_fastqc         | 97.76 | 16.902.561 | 5.398.124 | 31.9 | 16.124.9 | 95.5 | 16.435.4 | 694.896.967.502. | 696.871.654.676.83 | 0.013829  | 97.24 | 0.08  |
|                                      |       |            |           |      | 92       |      | 05       | 731              | 9                  |           |       |       |

|                                      |       |            |           |      |          |      |          |                  |                    |           |       |       |
|--------------------------------------|-------|------------|-----------|------|----------|------|----------|------------------|--------------------|-----------|-------|-------|
| 26004_h3k9ac_rep<br>3_rap_fastqc     | 97.48 | 16.572.919 | 5.104.133 | 30.8 | 13.677.5 | 82.7 | 13.062.1 | 735.996.861.424. | 739.135.791.025.04 | 2.814.063 | 78.82 | 16.98 |
| 26007_h3k14ac_re<br>p3_fastqc        | 97.89 | 14.574.983 | 474.023   | 32.5 | 13.939.1 | 95.7 | 14.156.8 | 779.406.442.069. | 781.452.414.804.99 | 0.040031  | 97.13 | 0.27  |
| 26008_h3k14ac_re<br>p3_rap_fastqc    | 97.52 | 13.634.579 | 4.196.136 | 30.8 | 11.762.2 | 86.3 | 1.143.36 | 803.285.919.644. | 804.304.242.916.70 | 173.715   | 83.86 | 12.74 |
| 26011_lane2_flagm<br>2_wt_rap_fastqc | 89.83 | 8.022.504  | 1.969.244 | 24.5 | 3.022.49 | 37.7 | 134.348  | 788.149.626.049. | 791.792.240.473.13 | 5.094.587 | 16.75 | 63.5  |

1165

1166

1167 **Table S2.** List of primers used in this study.

| Name                                                                         | Sequence (5' - 3')                                                    |
|------------------------------------------------------------------------------|-----------------------------------------------------------------------|
| <b>For generation of constructs for transformation of <i>A. nidulans</i></b> |                                                                       |
| argB2for                                                                     | ATGGGAGTCAAAGTTCTGTTTGC                                               |
| argB2rev                                                                     | GGAAGCGAGAGAACATGTCAA                                                 |
| basAlbfor                                                                    | GCAGATCCAATGCCAGATGC                                                  |
| basAArgBlbrev                                                                | AACAGAACTTTGACTCCCATTATGAGGAGAAGATGATTATC                             |
| basAArgBrbfor                                                                | GACATGTTCTCTCGCTTCCGATTACTGTGATTATTGGCAGC                             |
| basArbrev                                                                    | AGTTAAACATCAAGGACTTGGG                                                |
| cpcAlbfor                                                                    | GCGTTCTGGTGTCGGGTCTG                                                  |
| cpcAArgBlbrev                                                                | AACAGAACTTTGACTCCCATATGAAAAGAAAAATTCAGGG                              |
| cpcAArgBrbfor                                                                | GACATGTTCTCTCGCTTCCATCCTCTTTGACAGTTCGCTG                              |
| cpcArbrev                                                                    | CGAGACACGGCATTCTGGCAC                                                 |
| NJ08                                                                         | TGCCAGGGATAGAAACATGT                                                  |
| NJ09                                                                         | CGCAGACCTTTCTACAGATCTGGCATATGAGGAGAAGATGATTATC                        |
| NJ10                                                                         | TCCGGTTTCATACACCGGGCAAAGAATCTGGACATGCGACGGAG                          |
| NJ11                                                                         | TCCATCTCAACTCCATCACATACAATGACAGAACCTCGCCGG                            |
| NJ12                                                                         | TACCTATGTCTAGTAAAAGGAT                                                |
| NJ41                                                                         | TTTACGGTGACATGTTTCTATCCCTGGCACACNNNGTGTAGAAGATCTCCTACAATAT<br>TCTCAGC |
| NJ42                                                                         | CAAGAGCTATCCTTTTACTAGACATAGGTAAACTCGAGCCATCCGGAT                      |
| Pabacassfor                                                                  | TGCCAGATCTGTAGAAAGGTC                                                 |
| TetONfor                                                                     | TCTTTGCCCGGTGTATGAAACC                                                |
| TetONrev                                                                     | TGTGATGTGATGGAGTTGAGATGG                                              |
| TetON_pUC18tail<br>F                                                         | CACGACGTTGTAACGACGGCCAGTGCCATCTTTGCCCGGTGTATGAAA                      |
| Asyd_basRF                                                                   | ATGGCTGAACAACGTCGGCG                                                  |

| Name             | Sequence (5' - 3')                                  |
|------------------|-----------------------------------------------------|
| Asyd_basRR       | TCAATATCCATACGACTGCC                                |
| poliC_basRsidtai | AGTTGTCCAGCGCCGACGTTGTTTCAGCCATTGTGATGTGATGGAGTTGAG |
| Ttef_sydbastail_ | CTCCAGAGAGGGCAGTCGTATGGATATTGAGCGGACATTCGATTTATGCC  |
| hph_puc18tail_R  | GATCCTCTAGAGTCGACCTGCAGGCATGCACTATTCCTTTGCCCTCGGAC  |
| <b>qRT-PCR</b>   |                                                     |
| Qacn fwd         | CACCCTTGTTCTTGTTTTGCTC                              |
| Qacn rev         | AAGTTCGCTTTGGCAACGC                                 |
| qorsAfor         | CTATACCACCGATAGCCAGGAC                              |
| qorsArev         | CAGTGAGCAGGGCAAAGAAG                                |
| qorsDfor         | GCAACGAGCCTGACATTACC                                |
| qorsDrev         | CCGCACATCAACCATCTCTG                                |
| qareAfor         | AAATCTAGCTCAGCGGCGAC                                |
| qareArev         | GGGCTTTCCGCCATATCAAC                                |
| qniaDfor         | CTGACGAAGGGGAGTGAAAG                                |
| qniaDrev         | TCCATCCAACGACAGTAGG                                 |
| qprnDfor         | CGCTTTTGGTCTGCGTTAC                                 |
| qprnDrev         | CCGCTCAAAAACCAGACAATC                               |
| qgdhAfor         | TCAAGGGCATCATGGAGGAC                                |
| qgdhArev         | CTTGGTGAAACCGGCAATG                                 |
| qniiAfor         | GCGGGAAGATGGCTGGATTTAC                              |
| qniiArev         | CCACAGCTTCACCCTTCTTAC                               |
| qtamAfor         | TGATGACCAGCTCGTCAAAACC                              |
| Qtamrev          | CCGCATCGTCATACTTTCCTC                               |
| qglAfor          | GCCCGTAAGAATGTCAAGACCC                              |

| <b>Name</b> | <b>Sequence (5' - 3')</b> |
|-------------|---------------------------|
| qgltArev    | GCTGAGAGCTGATGCCAGAAAG    |
| qmeaAfor    | TGACTACCTTGCCTGGACAC      |
| qmeaArev    | GCCGTTGCGATTCTTCCTTG      |
| qureDfor    | AGCGGGATGCAGCAAAGATG      |
| qureDrev    | AAGGCTCAACACTCCCAGAC      |
| qprnBfor    | GTCAGAGGTTGACATCTTTACG    |
| qprnBrev    | AAATCCACCACCAGACTCG       |
| qbasRfw     | GCGGGTACATGCCACAATAC      |
| qbasRrev    | TCTCGGGCATCATCAACTCC      |

1168
